# Supplementary material for: Theoretical study of hydrogen bonding interactions in substituted nitroxide radicals
Source: Royal Society of Chemistry journal article supplement (doi:10.1039/d0nj05362g), 2021-01-01
Supplement: d0nj05362g1.pdf [file d0nj05362g1.pdf]

## Supporting Information

### Theoretical Study of Hydrogen Bonding Interaction in Substituted Nitroxide Radicals

Thufail M. Ismail<sup>a</sup>, Neetha Mohan<sup>b,c</sup>, and P. K. Sajith\*<sup>a</sup>

<sup>a</sup>Department of Chemistry, Farook College, Kozhikode, Kerala, India

<sup>b</sup>Department of Chemistry, Christopher Ingold Building, University College London (UCL), 20  
Gordon Street London WC1H 0AJ, UK.

<sup>c</sup>Institute for Materials Discovery, University College London (UCL), UK

#### Table of Contents

|                                                                                                                          |     |
|--------------------------------------------------------------------------------------------------------------------------|-----|
| <b>Table S1:</b> Benchmark study of UM06L with <i>ab initio</i> methods on $E_{int}$ values.                             | S2  |
| <b>Table S2:</b> N–O distance ( $d_1$ ) of nitroxide radicals with and without substituents.                             | S3  |
| <b>Table S3:</b> Spin densities on nitrogen and oxygen atoms on NO unit of nitroxide radicals.                           | S4  |
| <b>Fig. S1:</b> Correlation between NO···H distance ( $d_2$ ) and $V_{min}$ for NO···HF complexes.                       | S5  |
| <b>Table S4:</b> Spin densities on nitrogen, oxygen, hydrogen and fluorine of NO···HF complexes.                         | S6  |
| <b>Table S5:</b> QTAIM parameters at the bcp of NO···H bond path for NO···HF complexes.                                  | S7  |
| <b>Table S6:</b> $E_{int}$ values of unsubstituted NO···H <sub>2</sub> O complexes.                                      | S8  |
| <b>Fig. S2:</b> Correlation between $V_{min}$ and $E_{int}$ for NO···H <sub>2</sub> O complexes.                         | S9  |
| <b>Fig. S3:</b> QTAIM topological plot with QTAIM parameters of radical <b>4</b> with H <sub>2</sub> O & CH <sub>4</sub> | S9  |
| <b>Table S7:</b> Values of QTAIM parameters for selected NO···H <sub>2</sub> O and NO···CH <sub>4</sub> complexes.       | S10 |
| <b>Table S8:</b> SAPT derived components of interaction energy of selected NO···HF complexes.                            | S10 |
| <b>Table S9:</b> SAPT derived components of interaction energy of selected NO···H <sub>2</sub> O complexes.              | S11 |
| <b>Table S10:</b> SAPT derived components of interaction energy of selected NO···CH <sub>4</sub> complexes.              | S11 |
| Coordinates of Optimized Structures.                                                                                     | S12 |

## Benchmark study

The performance of the functional UM06L/6-311++G(d,p) for the calculation of  $E_{int}$  is compared with high level *ab initio* methods *viz.* UMP2/6-311++G(d,p), UMP4(SDQ)/6-311++G(d,p) and UCCSD(T)/6-311++G(d,p)//UMP4(SDQ)/6-311++G(d,p). We have selected ten representative complexes of unsubstituted nitroxide radicals with HF, namely **3**, **4**, **11**, **12**, **13**, **16**, **17**, **21**, **24**, and **25** for this study. All calculated  $E_{int}$  values are presented in Table S1. When compared to UCCSD(T)/6-311++G(d,p)//UMP4(SDQ)/6-311++G(d,p) method, UM06L/6-311++G(d,p) method slightly overestimate the  $E_{int}$  of nitroxide radicals, whereas  $E_{int}$  values of iminoxyl radicals are more or less comparable. The  $E_{int}$  values calculated at UCCSD(T)/6-311++G(d,p)//UMP4(SDQ)/6-311++G(d,p) level of theory deviates from UM06L/6-311++G(d,p) by 0.38 – -1.67 kcal/mol. A reasonably good correlation exist between the  $E_{int}$  values calculated at the UM06L method and the values calculated using wavefunction methods. The correlation coefficients are respectively 0.983, 0.964 and 0.945 for single point calculations at UCCSD(T), UMP4(SDQ) and UMP2 methods. The decent correlation of the  $E_{int}$  values calculated using the *ab initio* methods with UM06L method clearly justify the use of UM06L method for the calculations in this manuscript.

**Table S1.**  $E_{int}$  of ten unsubstituted NO $\cdots$ HF complexes namely, **3**, **4**, **11**, **12**, **13**, **16**, **17**, **21**, **24**, and **25** computed with UM06L, UMP2, UMP4(SDQ), and UCCSD(T)//UMP4(SDQ) level of theories.

| Structure | $E_{int}$ (in kcal/mol) |                        |                             |                                                               |
|-----------|-------------------------|------------------------|-----------------------------|---------------------------------------------------------------|
|           | UM06L<br>/6-311++G(d,p) | UMP2<br>/6-311++G(d,p) | UMP4(SDQ)<br>/6-311++G(d,p) | UCCSD(T)/ 6-311<br>++G(d,p)//<br>UMP4(SDQ)/ 6-<br>311++G(d,p) |
| <b>3</b>  | -12.35                  | -12.85                 | -11.63                      | -11.70                                                        |
| <b>4</b>  | -12.51                  | -13.24                 | -11.76                      | -11.70                                                        |
| <b>11</b> | -12.22                  | -12.67                 | -11.46                      | -11.50                                                        |
| <b>12</b> | -11.69                  | -12.29                 | -10.99                      | -10.98                                                        |
| <b>13</b> | -14.99                  | -15.77                 | -13.34                      | -13.32                                                        |
| <b>16</b> | -10.65                  | -10.10                 | -9.25                       | -9.63                                                         |
| <b>17</b> | -9.05                   | -7.20                  | -6.89                       | -7.52                                                         |
| <b>21</b> | -11.95                  | -11.07                 | -11.25                      | -11.62                                                        |
| <b>24</b> | -5.42                   | -6.40                  | -5.88                       | -5.68                                                         |
| <b>25</b> | -6.11                   | -7.59                  | -6.77                       | -6.49                                                         |

**Table S2.** N–O distance ( $d_1$ ) of nitroxide radicals with and without substituents (X = H, CH<sub>3</sub>, and F).

| Structure | $d_1$<br>(Å) |                    |       |
|-----------|--------------|--------------------|-------|
|           | X =H         | X =CH <sub>3</sub> | X =F  |
| <b>1</b>  | 1.270        | 1.275              | 1.147 |
| <b>2</b>  | 1.264        | 1.266              | 1.258 |
| <b>3</b>  | 1.263        | 1.265              | 1.258 |
| <b>4</b>  | 1.274        | 1.275              | 1.267 |
| <b>5</b>  | 1.276        | 1.277              | 1.266 |
| <b>6</b>  | 1.261        | 1.262              | 1.259 |
| <b>7</b>  | 1.262        | 1.264              | 1.257 |
| <b>8</b>  | 1.271        | 1.271              | 1.266 |
| <b>9</b>  | 1.269        | 1.271              | 1.265 |
| <b>10</b> | 1.272        | 1.272              | 1.271 |
| <b>11</b> | 1.262        | 1.264              | 1.255 |
| <b>12</b> | 1.262        | 1.264              | 1.256 |
| <b>13</b> | 1.268        | 1.283              | 1.274 |
| <b>14</b> | 1.262        | 1.265              | 1.258 |
| <b>15</b> | 1.258        | 1.262              | 1.253 |
| <b>16</b> | 1.269        | 1.271              | 1.264 |
| <b>17</b> | 1.260        | 1.263              | 1.260 |
| <b>18</b> | 1.277        | 1.277              | 1.268 |
| <b>19</b> | 1.268        | 1.269              | 1.266 |
| <b>20</b> | 1.263        | 1.266              | 1.260 |
| <b>21</b> | 1.260        | 1.268              | 1.259 |
| <b>22</b> | 1.273        | 1.275              | 1.265 |
| <b>23</b> | 1.262        | 1.266              | 1.264 |
| <b>24</b> | 1.216        | 1.230              | 1.243 |
| <b>25</b> | 1.224        | 1.227              | 1.234 |
| <b>26</b> | 1.223        | 1.226              | 1.233 |
| <b>27</b> | 1.224        | 1.224              | 1.216 |

**Table S3.** Spin densities on N and O atoms of NO unit in nitroxide and iminoxyl radicals with and without substituents (X = H, CH<sub>3</sub>, and F).

| Structure | Spin density (in au) |        |                     |        |        |        |
|-----------|----------------------|--------|---------------------|--------|--------|--------|
|           | X = H                |        | X = CH <sub>3</sub> |        | X = F  |        |
|           | N                    | O      | N                   | O      | N      | O      |
| <b>1</b>  | 0.4351               | 0.5984 | 0.4191              | 0.5296 | 0.3650 | 0.2187 |
| <b>2</b>  | 0.4327               | 0.5121 | 0.4532              | 0.5038 | 0.3223 | 0.6195 |
| <b>3</b>  | 0.4273               | 0.5224 | 0.4687              | 0.5072 | 0.3315 | 0.6169 |
| <b>4</b>  | 0.4501               | 0.5365 | 0.4407              | 0.5206 | 0.3268 | 0.6291 |
| <b>5</b>  | 0.4038               | 0.5243 | 0.4491              | 0.5225 | 0.3597 | 0.5896 |
| <b>6</b>  | 0.3231               | 0.4538 | 0.3424              | 0.4453 | 0.3016 | 0.5051 |
| <b>7</b>  | 0.4206               | 0.5194 | 0.4793              | 0.5002 | 0.3197 | 0.6105 |
| <b>8</b>  | 0.3403               | 0.4673 | 0.3565              | 0.4752 | 0.3159 | 0.5292 |
| <b>9</b>  | 0.3110               | 0.4443 | 0.3386              | 0.4400 | 0.2774 | 0.5191 |
| <b>10</b> | 0.2948               | 0.4443 | 0.2957              | 0.4420 | 0.2825 | 0.4696 |
| <b>11</b> | 0.4344               | 0.5131 | 0.4789              | 0.4954 | 0.3096 | 0.6218 |
| <b>12</b> | 0.4347               | 0.5170 | 0.4701              | 0.5000 | 0.3254 | 0.6169 |
| <b>13</b> | 0.3254               | 0.5322 | 0.3406              | 0.5273 | 0.1828 | 0.6298 |
| <b>14</b> | 0.4235               | 0.5234 | 0.4721              | 0.5047 | 0.3237 | 0.6216 |
| <b>15</b> | 0.3150               | 0.4753 | 0.3482              | 0.4750 | 0.2688 | 0.5884 |
| <b>16</b> | 0.3208               | 0.5048 | 0.3290              | 0.4970 | 0.2805 | 0.5764 |
| <b>17</b> | 0.2426               | 0.4501 | 0.2706              | 0.4525 | 0.2132 | 0.5638 |
| <b>18</b> | 0.4005               | 0.5224 | 0.4588              | 0.5221 | 0.3817 | 0.5774 |
| <b>19</b> | 0.3343               | 0.4576 | 0.3444              | 0.4499 | 0.3195 | 0.5057 |
| <b>20</b> | 0.4144               | 0.5320 | 0.4486              | 0.5193 | 0.2989 | 0.6326 |
| <b>21</b> | 0.2487               | 0.3309 | 0.2780              | 0.3150 | 0.2079 | 0.3739 |
| <b>22</b> | 0.2447               | 0.3409 | 0.2545              | 0.3316 | 0.2201 | 0.3752 |
| <b>23</b> | 0.1687               | 0.3455 | 0.1797              | 0.3367 | 0.1654 | 0.3491 |
| <b>24</b> | 0.4731               | 0.5591 | 0.4401              | 0.5872 | 0.3448 | 0.6723 |
| <b>25</b> | 0.4458               | 0.5750 | 0.4523              | 0.5790 | 0.4130 | 0.6170 |
| <b>26</b> | 0.4449               | 0.5743 | 0.4633              | 0.5797 | 0.4156 | 0.6190 |
| <b>27</b> | 0.4619               | 0.5878 | 0.4532              | 0.5770 | 0.4663 | 0.5807 |

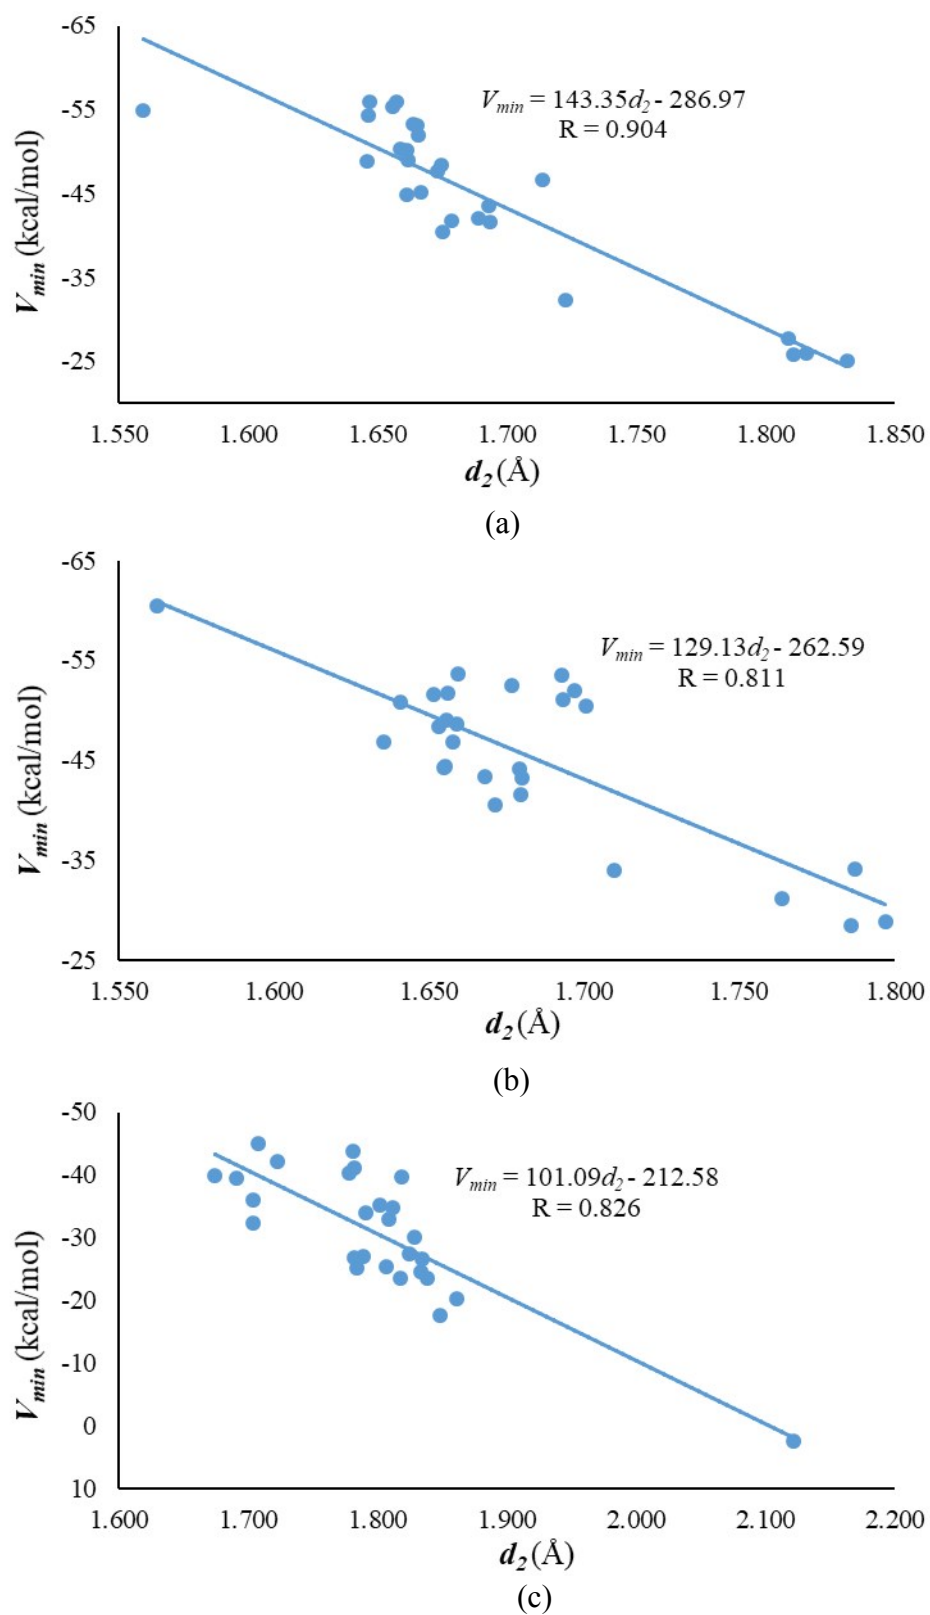

**Fig. S1** Correlation between the NO...H distance ( $d_2$ ) and  $V_{min}$  of nitroxide radicals with different substituents (a) for X = H (b) for X = CH<sub>3</sub>, and (c) for X = F.

**Table S4.** Spin densities on atoms nitrogen, oxygen, hydrogen, and fluorine calculated for NO⋯HF complexes of unsubstituted nitroxide radicals.

| Structure | Spin density (in au) |        |         |         |
|-----------|----------------------|--------|---------|---------|
|           | N                    | O      | H       | F       |
| <b>1</b>  | 0.4833               | 0.5596 | -0.0076 | -0.0004 |
| <b>2</b>  | 0.4659               | 0.4839 | -0.0142 | 0.0049  |
| <b>3</b>  | 0.4599               | 0.4943 | -0.0141 | 0.0050  |
| <b>4</b>  | 0.4826               | 0.5023 | -0.0127 | 0.0039  |
| <b>5</b>  | 0.4542               | 0.4767 | -0.0114 | 0.0076  |
| <b>6</b>  | 0.3464               | 0.4203 | -0.0128 | 0.0047  |
| <b>7</b>  | 0.4464               | 0.4991 | -0.0155 | 0.0060  |
| <b>8</b>  | 0.3669               | 0.4303 | -0.0137 | 0.0047  |
| <b>9</b>  | 0.3368               | 0.4042 | -0.0121 | 0.0057  |
| <b>10</b> | 0.3412               | 0.3698 | -0.0025 | 0.0068  |
| <b>11</b> | 0.4684               | 0.4835 | -0.0135 | 0.0046  |
| <b>12</b> | 0.4732               | 0.4826 | -0.0122 | 0.0040  |
| <b>13</b> | 0.3864               | 0.4792 | -0.0102 | 0.0016  |
| <b>14</b> | 0.4578               | 0.4949 | -0.0127 | 0.0043  |
| <b>15</b> | 0.3442               | 0.4451 | -0.0114 | 0.0043  |
| <b>16</b> | 0.3509               | 0.4761 | -0.0125 | 0.0042  |
| <b>17</b> | 0.2782               | 0.4154 | 0.0005  | 0.0007  |
| <b>18</b> | 0.4401               | 0.4851 | -0.0095 | 0.0032  |
| <b>19</b> | 0.3603               | 0.4164 | -0.0114 | 0.0037  |
| <b>20</b> | 0.4460               | 0.4988 | -0.0122 | 0.0044  |
| <b>21</b> | 0.2563               | 0.2907 | -0.0076 | 0.0028  |
| <b>22</b> | 0.2520               | 0.2914 | -0.0069 | 0.0026  |
| <b>23</b> | 0.1616               | 0.2897 | -0.0069 | 0.0017  |
| <b>24</b> | 0.4953               | 0.5346 | -0.0052 | 0.0023  |
| <b>25</b> | 0.4702               | 0.5469 | -0.0064 | 0.0026  |
| <b>26</b> | 0.4686               | 0.5450 | -0.0067 | 0.0027  |
| <b>27</b> | 0.4840               | 0.5573 | -0.0090 | 0.0038  |

**Table S5.** AIM parameters at the bcp of NO...H bond for all complexes with and without substituents. All  $\rho$ ,  $\nabla^2\rho$ , and  $H$  values are in atomic units.

| Structure | X=H    |                |         | X=CH <sub>3</sub> |                |         | X=F    |                |         |
|-----------|--------|----------------|---------|-------------------|----------------|---------|--------|----------------|---------|
|           | $\rho$ | $\nabla^2\rho$ | $H$     | $\rho$            | $\nabla^2\rho$ | $H$     | $\rho$ | $\nabla^2\rho$ | $H$     |
| <b>1</b>  | 0.0434 | 0.1385         | -0.0029 | 0.0478            | 0.1501         | -0.0042 | 0.0125 | 0.0560         | 0.0029  |
| <b>2</b>  | 0.0483 | 0.1501         | -0.0044 | 0.0406            | 0.1425         | -0.0010 | 0.0305 | 0.1175         | 0.0020  |
| <b>3</b>  | 0.0474 | 0.1489         | -0.0041 | 0.0401            | 0.1415         | -0.0008 | 0.0308 | 0.1184         | 0.0020  |
| <b>4</b>  | 0.0482 | 0.1504         | -0.0043 | 0.0401            | 0.1433         | -0.0008 | 0.0297 | 0.1156         | 0.0022  |
| <b>5</b>  | 0.0489 | 0.1526         | -0.0046 | 0.0431            | 0.1459         | -0.0021 | 0.0323 | 0.1236         | 0.0013  |
| <b>6</b>  | 0.0471 | 0.1493         | -0.0043 | 0.0459            | 0.1498         | -0.0029 | 0.0399 | 0.1414         | -0.0007 |
| <b>7</b>  | 0.0451 | 0.1480         | -0.0036 | 0.0361            | 0.1404         | -0.0006 | 0.0306 | 0.1187         | 0.0017  |
| <b>8</b>  | 0.0469 | 0.1507         | -0.0040 | 0.0453            | 0.1506         | -0.0028 | 0.0325 | 0.1261         | 0.0016  |
| <b>9</b>  | 0.0471 | 0.1502         | -0.0037 | 0.0423            | 0.1438         | -0.0017 | 0.0321 | 0.1194         | 0.0014  |
| <b>10</b> | 0.0424 | 0.1474         | -0.0016 | 0.0418            | 0.1445         | -0.0013 | 0.0387 | 0.1421         | -0.0002 |
| <b>11</b> | 0.0473 | 0.1488         | -0.0040 | 0.0467            | 0.1527         | -0.0034 | 0.0290 | 0.1128         | 0.0023  |
| <b>12</b> | 0.0461 | 0.1472         | -0.0035 | 0.0466            | 0.1518         | -0.0034 | 0.0296 | 0.1149         | 0.0021  |
| <b>13</b> | 0.0653 | 0.1642         | -0.0138 | 0.0631            | 0.1637         | -0.0122 | 0.0488 | 0.1498         | -0.0054 |
| <b>14</b> | 0.0464 | 0.1472         | -0.0037 | 0.0475            | 0.1526         | -0.0038 | 0.0295 | 0.1120         | 0.0019  |
| <b>15</b> | 0.0439 | 0.1428         | -0.0027 | 0.0436            | 0.1478         | -0.0021 | 0.0279 | 0.1097         | 0.0025  |
| <b>16</b> | 0.0427 | 0.1417         | -0.0021 | 0.0432            | 0.1492         | -0.0018 | 0.0342 | 0.1223         | 0.0005  |
| <b>17</b> | 0.0405 | 0.1376         | -0.0013 | 0.0397            | 0.1426         | -0.0005 | 0.0329 | 0.1180         | 0.0007  |
| <b>18</b> | 0.0490 | 0.1530         | -0.0046 | 0.0459            | 0.1561         | -0.0028 | 0.0320 | 0.1222         | 0.0013  |
| <b>19</b> | 0.0451 | 0.1503         | -0.0032 | 0.0461            | 0.1535         | -0.0031 | 0.0371 | 0.1387         | 0.0003  |
| <b>20</b> | 0.0475 | 0.1485         | -0.0042 | 0.0463            | 0.1537         | -0.0032 | 0.0285 | 0.1117         | 0.0024  |
| <b>21</b> | 0.0490 | 0.1499         | -0.0049 | 0.0491            | 0.1577         | -0.0044 | 0.0335 | 0.1260         | 0.0012  |
| <b>22</b> | 0.0503 | 0.1526         | -0.0054 | 0.0480            | 0.1563         | -0.0039 | 0.0430 | 0.1407         | -0.0025 |
| <b>23</b> | 0.0467 | 0.1456         | -0.0040 | 0.0438            | 0.1380         | -0.0026 | 0.0406 | 0.1375         | -0.0018 |
| <b>24</b> | 0.0279 | 0.1118         | 0.0026  | 0.0333            | 0.1221         | 0.0009  | 0.0285 | 0.1075         | 0.0017  |
| <b>25</b> | 0.0298 | 0.1031         | 0.0025  | 0.0318            | 0.1196         | 0.0016  | 0.0303 | 0.1157         | 0.0018  |
| <b>26</b> | 0.0297 | 0.1150         | 0.0021  | 0.0338            | 0.1236         | 0.0013  | 0.0330 | 0.1185         | 0.0011  |
| <b>27</b> | 0.0301 | 0.1152         | 0.0018  | 0.0306            | 0.1110         | 0.0015  | 0.0283 | 0.1108         | 0.0022  |

**Table S6.**  $E_{int}$  values of unsubstituted NO $\cdots$ H<sub>2</sub>O complexes. All values are in kcal/mol.

| Structure | $E_{int}$ |
|-----------|-----------|
| <b>1</b>  | -8.29     |
| <b>2</b>  | -8.15     |
| <b>3</b>  | -8.04     |
| <b>4</b>  | -7.84     |
| <b>5</b>  | -8.84     |
| <b>6</b>  | -7.88     |
| <b>7</b>  | -8.04     |
| <b>8</b>  | -7.81     |
| <b>9</b>  | -7.89     |
| <b>10</b> | -6.23     |
| <b>11</b> | -7.96     |
| <b>12</b> | -7.88     |
| <b>13</b> | -12.04    |
| <b>14</b> | -8.13     |
| <b>15</b> | -7.11     |
| <b>16</b> | -7.20     |
| <b>17</b> | -6.51     |
| <b>18</b> | -8.73     |
| <b>19</b> | -7.53     |
| <b>20</b> | -7.69     |
| <b>21</b> | -8.41     |
| <b>22</b> | -7.91     |
| <b>23</b> | -7.94     |
| <b>24</b> | -4.60     |
| <b>25</b> | -3.74     |
| <b>26</b> | -3.89     |
| <b>27</b> | -4.16     |



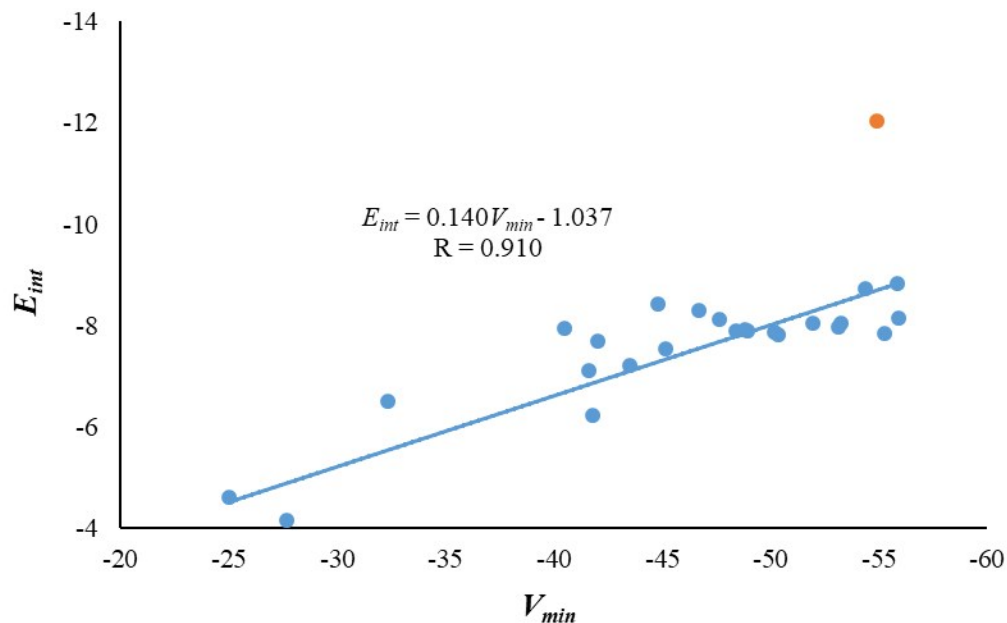

**Fig. S2** Correlation between values of  $V_{min}$  and  $E_{int}$  for unsubstituted  $\text{NO}\cdots\text{H}_2\text{O}$  complexes. All values are in kcal/mol. The values of  $V_{min}$  and  $E_{int}$  for radical **13** (indicated as red circle) is excluded in the correlation curve. This is due to the interaction between phosphorus atom and water molecule in  $\text{NO}\cdots\text{H}_2\text{O}$  complex of **13**.

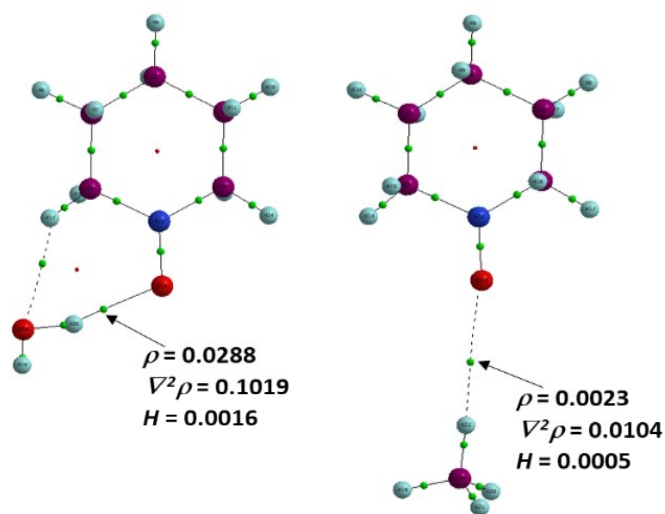

**Fig. S3** QAIM topological plot and QAIM parameters (in au) of hydrogen bonded complex of unsubstituted nitroxide radical **4** with water and methane molecule.

**Table S7.** Values of QTAIM parameters for H<sub>2</sub>O and CH<sub>4</sub> -interacted radicals of **3**, **4**, **11**, **12**, **13**, **16**, **17**, **21**, **24**, and **25**. The values of  $\rho$ ,  $\nabla^2\rho$  and  $H$  at the bcp of NO...H bond are given in atomic units.

| Structure | Complexes with H <sub>2</sub> O |                |         | Complexes with CH <sub>4</sub> |                |        |
|-----------|---------------------------------|----------------|---------|--------------------------------|----------------|--------|
|           | $\rho$                          | $\nabla^2\rho$ | $H$     | $\rho$                         | $\nabla^2\rho$ | $H$    |
| <b>3</b>  | 0.0286                          | 0.1013         | 0.0017  | 0.0023                         | 0.0104         | 0.0005 |
| <b>4</b>  | 0.0288                          | 0.1019         | 0.0016  | 0.0023                         | 0.0104         | 0.0005 |
| <b>11</b> | 0.0287                          | 0.1021         | 0.0017  | 0.0074                         | 0.0239         | 0.0006 |
| <b>12</b> | 0.0280                          | 0.1004         | 0.0018  | 0.0067                         | 0.0213         | 0.0005 |
| <b>13</b> | 0.0369                          | 0.1242         | -0.0002 | 0.0106                         | 0.0303         | 0.0007 |
| <b>16</b> | 0.0264                          | 0.0956         | 0.0020  | 0.0023                         | 0.0104         | 0.0005 |
| <b>17</b> | 0.0248                          | 0.0911         | 0.0021  | 0.0023                         | 0.0103         | 0.0005 |
| <b>21</b> | 0.0277                          | 0.0984         | 0.0017  | 0.0023                         | 0.0105         | 0.0005 |
| <b>24</b> | 0.0153                          | 0.0582         | 0.0020  | 0.0022                         | 0.0102         | 0.0005 |
| <b>25</b> | 0.0160                          | 0.0671         | 0.0026  | 0.0013                         | 0.0063         | 0.0004 |

**Table S8.** The SAPT partitioning of interaction energy for unsubstituted complexes of **3**, **4**, **11**, **12**, **13**, **16**, **17**, **21**, **24**, and **25** nitroxide radical with HF. All energy values are in kcal/mol.

| Structure | $E_{elst}$ | $E_{exch}$ | $E_{ind}$ | $E_{disp}$ | $E_{int}^{SAPT}$ |
|-----------|------------|------------|-----------|------------|------------------|
| <b>3</b>  | -17.62     | 16.78      | -8.44     | -4.32      | -13.60           |
| <b>4</b>  | -18.31     | 18.08      | -8.82     | -4.47      | -13.52           |
| <b>11</b> | -17.73     | 16.96      | -8.45     | -4.35      | -13.57           |
| <b>12</b> | -16.96     | 16.48      | -8.07     | -4.29      | -12.83           |
| <b>13</b> | -27.53     | 31.60      | -14.94    | -7.28      | -18.14           |
| <b>16</b> | -15.21     | 15.82      | -7.63     | -4.20      | -11.22           |
| <b>17</b> | -13.04     | 13.94      | -6.88     | -3.94      | -9.91            |
| <b>21</b> | -19.06     | 17.96      | -9.11     | -4.70      | -14.92           |
| <b>24</b> | -7.59      | 7.22       | -3.81     | -2.23      | -6.41            |
| <b>25</b> | -7.58      | 8.34       | -4.17     | -2.84      | -6.25            |

**Table S9.** The SAPT partitioning of interaction energy for unsubstituted complexes of **3**, **4**, **11**, **12**, **13**, **16**, **17**, **21**, **24**, and **25** nitroxide radical with H<sub>2</sub>O. All energy values are in kcal/mol.

| Structure | $E_{elst}$ | $E_{exch}$ | $E_{ind}$ | $E_{disp}$ | $E_{int}^{SAPT}$ |
|-----------|------------|------------|-----------|------------|------------------|
| <b>3</b>  | -11.33     | 11.04      | -3.77     | -4.22      | -8.27            |
| <b>4</b>  | -11.89     | 12.18      | -4.00     | -4.21      | -7.91            |
| <b>11</b> | -11.74     | 11.70      | -3.93     | -4.26      | -8.23            |
| <b>12</b> | -11.60     | 11.60      | -3.78     | -4.28      | -8.06            |
| <b>13</b> | -21.51     | 22.57      | -7.67     | -6.92      | -13.52           |
| <b>16</b> | -10.34     | 10.79      | -3.38     | -4.05      | -6.98            |
| <b>17</b> | -9.52      | 10.37      | -3.17     | -4.10      | -6.43            |
| <b>21</b> | -14.10     | 13.66      | -4.61     | -4.70      | -9.74            |
| <b>24</b> | -5.98      | 6.38       | -1.86     | -3.14      | -4.60            |
| <b>25</b> | -5.33      | 5.79       | -1.58     | -3.03      | -4.15            |

**Table S10.** The SAPT partitioning of interaction energy for unsubstituted complexes of **3**, **4**, **11**, **12**, **13**, **16**, **17**, **21**, **24**, and **25** nitroxide radical with CH<sub>4</sub>. All energy values are in kcal/mol.

| Structure | $E_{elst}$ | $E_{exch}$ | $E_{ind}$ | $E_{disp}$ | $E_{int}^{SAPT}$ |
|-----------|------------|------------|-----------|------------|------------------|
| <b>3</b>  | -0.26      | 0.21       | -0.13     | -0.48      | -0.66            |
| <b>4</b>  | -0.27      | 0.22       | -0.13     | -0.49      | -0.67            |
| <b>11</b> | -1.24      | 2.74       | -0.44     | -2.99      | -1.93            |
| <b>12</b> | -1.43      | 3.19       | -0.44     | -3.39      | -2.06            |
| <b>13</b> | -2.21      | 4.22       | -1.03     | -3.05      | -2.07            |
| <b>16</b> | -0.22      | 0.21       | -0.08     | -0.49      | -0.58            |
| <b>17</b> | -0.21      | 0.21       | -0.06     | -0.48      | -0.54            |
| <b>21</b> | -0.26      | 0.21       | -0.12     | -0.51      | -0.68            |
| <b>24</b> | -0.17      | 0.20       | -0.05     | -0.43      | -0.44            |
| <b>25</b> | -0.09      | 0.08       | -0.03     | -0.32      | -0.36            |

Coordinates of optimized structures of 27 Nitroxide radicals (X = H, CH<sub>3</sub>, and F)

|                                                                                                                                                                                                                                                                                                                                                                                                                                                                                                                                                                                                                                                                                                                                                                                                                                                                                                                                                                                                                                                                                                                                     |                                                                                                                                                                                                                                                                                                                                                                                                                                                                                                                                                                                                                                          |
|-------------------------------------------------------------------------------------------------------------------------------------------------------------------------------------------------------------------------------------------------------------------------------------------------------------------------------------------------------------------------------------------------------------------------------------------------------------------------------------------------------------------------------------------------------------------------------------------------------------------------------------------------------------------------------------------------------------------------------------------------------------------------------------------------------------------------------------------------------------------------------------------------------------------------------------------------------------------------------------------------------------------------------------------------------------------------------------------------------------------------------------|------------------------------------------------------------------------------------------------------------------------------------------------------------------------------------------------------------------------------------------------------------------------------------------------------------------------------------------------------------------------------------------------------------------------------------------------------------------------------------------------------------------------------------------------------------------------------------------------------------------------------------------|
| <b>1 (X = H)</b><br>N 0.53749500000 0.00000000000 -0.03615100000<br>O -0.73168800000 0.00000000000 0.00904200000<br>H 1.04551900000 -0.87457700000 0.09036100000<br>H 1.04551800000 0.87457700000 0.09036100000                                                                                                                                                                                                                                                                                                                                                                                                                                                                                                                                                                                                                                                                                                                                                                                                                                                                                                                     | <b>1 (X = CH<sub>3</sub>)</b><br>N 0.000002000 0.122099000 -0.148152000<br>O -0.000032000 1.382584000 0.042137000<br>C -1.247001000 -0.602122000 0.024185000<br>H -2.056618000 0.017633000 -0.357814000<br>H -1.211174000 -1.547024000 -0.522509000<br>H -1.435657000 -0.815764000 1.084994000<br>C 1.247026000 -0.602080000 0.024227000<br>H 1.211408000 -1.546800000 -0.522799000<br>H 2.056664000 0.017883000 -0.357382000<br>H 1.435462000 -0.816079000 1.085004000                                                                                                                                                                  |
| <b>1 (X = F)</b><br>N -0.725236000 -0.093385000 0.277312000<br>O 0.184874000 -0.633741000 -0.204987000<br>F -0.917127000 1.337786000 -0.071799000<br>F -2.050222000 -0.667855000 0.003138000<br>H 2.252139000 -0.156355000 -0.218889000<br>F 3.116851000 -0.016599000 0.059505000                                                                                                                                                                                                                                                                                                                                                                                                                                                                                                                                                                                                                                                                                                                                                                                                                                                   | <b>2 (X = H)</b><br>C 0.021501000 1.214460000 -0.127598000<br>C -1.374766000 0.731180000 0.228229000<br>C 0.021379000 -1.214429000 0.126689000<br>C -1.375248000 -0.730975000 -0.227079000<br>H -1.523499000 0.786306000 1.311562000<br>H -2.161827000 -1.323284000 0.243425000<br>H -1.525585000 -0.786074000 -1.310210000<br>H -2.161925000 1.323597000 -0.241180000<br>N 0.832543000 -0.000267000 -0.002098000<br>O 2.096177000 -0.000044000 0.001338000<br>H 0.086489000 1.592786000 -1.157943000<br>H 0.422755000 1.987063000 0.533505000<br>H 0.420769000 -1.988306000 -0.534099000<br>H 0.088409000 -1.591273000 1.157479000      |
| <b>2 (X = CH<sub>3</sub>)</b><br>C 1.253800000 0.130191000 0.013611000<br>C 0.702674000 1.529313000 0.300026000<br>C -1.253856000 0.130328000 -0.013693000<br>C -0.702673000 1.529461000 -0.299743000<br>H 0.654556000 1.691199000 1.382670000<br>H -1.340212000 2.313805000 0.116060000<br>H -0.654501000 1.691599000 -1.382358000<br>H 1.340273000 2.313698000 -0.115616000<br>N -0.000033000 -0.671677000 -0.000733000<br>O -0.000092000 -1.937682000 -0.000541000<br>C -2.180135000 -0.399690000 -1.094178000<br>H -3.100909000 0.188594000 -1.130860000<br>H -1.701315000 -0.354343000 -2.076034000<br>H -2.440280000 -1.441011000 -0.893181000<br>C -1.908614000 0.026419000 1.362915000<br>H -1.264407000 0.439067000 2.144624000<br>H -2.859048000 0.567440000 1.381624000<br>H -2.103360000 -1.021138000 1.604426000<br>C 1.909584000 0.026919000 -1.362554000<br>H 1.265920000 0.439966000 -2.144503000<br>H 2.860043000 0.567928000 -1.380331000<br>H 2.104475000 -1.020524000 -1.604436000<br>C 2.179284000 -0.400312000 1.094572000<br>H 2.439968000 -1.441423000 0.893172000<br>H 3.099809000 0.188284000 1.132445000 | <b>2 (X = F)</b><br>C -1.207933000 -0.106039000 0.020582000<br>C -0.705662000 -1.504375000 0.291723000<br>C 1.208004000 -0.105987000 -0.020661000<br>C 0.705929000 -1.504228000 -0.292565000<br>H -0.685280000 -1.654751000 1.373336000<br>H 1.365132000 -2.249139000 0.150724000<br>H 0.685715000 -1.654237000 -1.374224000<br>H -1.364853000 -2.249185000 -0.151717000<br>N -0.000060000 0.710838000 -0.000152000<br>O -0.000088000 1.968607000 -0.000090000<br>F 2.069443000 0.365053000 -0.939025000<br>F 1.841213000 -0.009108000 1.183688000<br>F -2.068953000 0.364463000 0.939732000<br>F -1.841883000 -0.008590000 -1.183375000 |

|                               |              |              |              |                               |              |              |              |
|-------------------------------|--------------|--------------|--------------|-------------------------------|--------------|--------------|--------------|
| H                             | 1.699572000  | -0.355718000 | 2.076025000  |                               |              |              |              |
| <b>3 (X = H)</b>              |              |              |              | <b>3 (X = CH<sub>3</sub>)</b> |              |              |              |
| C                             | -0.047561000 | 1.218258000  | -0.000009000 | C                             | -1.249042000 | 0.174776000  | 0.000021000  |
| C                             | -1.431046000 | 0.666379000  | 0.000013000  | C                             | -0.665307000 | 1.556449000  | 0.000446000  |
| C                             | -0.047489000 | -1.218221000 | -0.000092000 | C                             | 1.249042000  | 0.174773000  | 0.000020000  |
| C                             | -1.430988000 | -0.666445000 | 0.000234000  | C                             | 0.665312000  | 1.556447000  | 0.000443000  |
| N                             | 0.767845000  | 0.000024000  | -0.000522000 | N                             | -0.000002000 | -0.632231000 | -0.000495000 |
| O                             | 2.030723000  | 0.000016000  | 0.000272000  | O                             | -0.000006000 | -1.897471000 | -0.000563000 |
| H                             | 0.186250000  | 1.830396000  | 0.882347000  | C                             | 2.056902000  | -0.140420000 | 1.256885000  |
| H                             | 0.186001000  | 1.830882000  | -0.882005000 | H                             | 2.981196000  | 0.442834000  | 1.278950000  |
| H                             | 0.186100000  | -1.830352000 | 0.882378000  | H                             | 1.483095000  | 0.085909000  | 2.158637000  |
| H                             | 0.186363000  | -1.830886000 | -0.881967000 | H                             | 2.316396000  | -1.201641000 | 1.270271000  |
| H                             | -2.311395000 | -1.296605000 | -0.000213000 | C                             | 2.057278000  | -0.139523000 | -1.256832000 |
| H                             | -2.311514000 | 1.296451000  | 0.000064000  | H                             | 1.483658000  | 0.087287000  | -2.158581000 |
|                               |              |              |              | H                             | 2.981502000  | 0.443862000  | -1.278315000 |
|                               |              |              |              | H                             | 2.316919000  | -1.200702000 | -1.270818000 |
|                               |              |              |              | C                             | -2.056902000 | -0.140418000 | 1.256882000  |
|                               |              |              |              | H                             | -1.483088000 | 0.085887000  | 2.158636000  |
|                               |              |              |              | H                             | -2.981183000 | 0.442855000  | 1.278960000  |
|                               |              |              |              | H                             | -2.316420000 | -1.201634000 | 1.270260000  |
|                               |              |              |              | C                             | -2.057275000 | -0.139519000 | -1.256834000 |
|                               |              |              |              | H                             | -2.316906000 | -1.200700000 | -1.270827000 |
|                               |              |              |              | H                             | -2.981505000 | 0.443858000  | -1.278309000 |
|                               |              |              |              | H                             | -1.483658000 | 0.087305000  | -2.158582000 |
|                               |              |              |              | H                             | -1.297889000 | 2.437448000  | 0.000753000  |
|                               |              |              |              | H                             | 1.297896000  | 2.437444000  | 0.000739000  |
| <b>3 (X = F)</b>              |              |              |              | <b>4 (X = H)</b>              |              |              |              |
| C                             | -1.200970000 | 0.143179000  | -0.000094000 | C                             | -1.054702000 | 1.249396000  | -0.259533000 |
| C                             | -0.663720000 | 1.535501000  | -0.000112000 | C                             | -1.798364000 | -0.000075000 | 0.194071000  |
| C                             | 1.200973000  | 0.143186000  | 0.000021000  | C                             | -1.054570000 | -1.249416000 | -0.259685000 |
| C                             | 0.663716000  | 1.535507000  | 0.000152000  | C                             | 0.377530000  | -1.247959000 | 0.250383000  |
| N                             | 0.000000000  | -0.679275000 | -0.000133000 | C                             | 0.377437000  | 1.248092000  | 0.250297000  |
| O                             | 0.000011000  | -1.936971000 | -0.000129000 | H                             | -1.558839000 | 2.156515000  | 0.087249000  |
| F                             | -1.967094000 | -0.129930000 | -1.081171000 | H                             | -1.045693000 | 1.292781000  | -1.355433000 |
| F                             | -1.966778000 | -0.129673000 | 1.081445000  | H                             | -2.821118000 | -0.000061000 | -0.193984000 |
| F                             | 1.966901000  | -0.130018000 | 1.081310000  | H                             | -1.881772000 | -0.000154000 | 1.289630000  |
| F                             | 1.966963000  | -0.129577000 | -1.081307000 | H                             | -1.558628000 | -2.156651000 | 0.086900000  |
| H                             | -1.326771000 | 2.389619000  | -0.000337000 | H                             | -1.045493000 | -1.292571000 | -1.355598000 |
| H                             | 1.326756000  | 2.389633000  | -0.000003000 | N                             | 1.060313000  | -0.000070000 | -0.094703000 |
|                               |              |              |              | O                             | 2.332786000  | 0.000043000  | -0.162385000 |
|                               |              |              |              | H                             | 0.977738000  | -2.055042000 | -0.172023000 |
|                               |              |              |              | H                             | 0.393598000  | -1.362314000 | 1.347430000  |
|                               |              |              |              | H                             | 0.394063000  | 1.362548000  | 1.347242000  |
|                               |              |              |              | H                             | 0.977682000  | 2.054868000  | -0.172607000 |
| <b>4 (X = CH<sub>3</sub>)</b> |              |              |              | <b>4 (X = F)</b>              |              |              |              |
| C                             | 1.236373000  | 1.384472000  | -0.502946000 | C                             | 1.242903000  | 1.352121000  | -0.466173000 |
| C                             | -0.000068000 | 2.108691000  | -0.002947000 | C                             | 0.000102000  | 2.067529000  | 0.037907000  |
| C                             | -1.236455000 | 1.384401000  | -0.503067000 | C                             | -1.242800000 | 1.352143000  | -0.466028000 |
| C                             | -1.322694000 | -0.068464000 | -0.028983000 | C                             | -1.264453000 | -0.088944000 | -0.027053000 |
| C                             | 1.322790000  | -0.068368000 | -0.028931000 | C                             | 1.264658000  | -0.088850000 | -0.026858000 |
| H                             | 2.153948000  | 1.896738000  | -0.192136000 | H                             | 2.164256000  | 1.813903000  | -0.104778000 |
| H                             | 1.233218000  | 1.395509000  | -1.600950000 | H                             | 1.277197000  | 1.359780000  | -1.560388000 |
| H                             | -0.000032000 | 3.144611000  | -0.355292000 | H                             | 0.000131000  | 3.103184000  | -0.307607000 |
| H                             | -0.000163000 | 2.164903000  | 1.092526000  | H                             | 0.000249000  | 2.101486000  | 1.132019000  |

|                  |              |              |              |                               |              |              |              |
|------------------|--------------|--------------|--------------|-------------------------------|--------------|--------------|--------------|
| H                | -2.154094000 | 1.896547000  | -0.192278000 | H                             | -2.164135000 | 1.813785000  | -0.104318000 |
| H                | -1.233170000 | 1.395378000  | -1.601040000 | H                             | -1.277384000 | 1.360212000  | -1.560189000 |
| N                | -0.000004000 | -0.750488000 | -0.234974000 | N                             | -0.000031000 | -0.792282000 | -0.295096000 |
| O                | 0.000030000  | -2.017277000 | -0.087160000 | O                             | 0.000131000  | -2.057700000 | -0.224311000 |
| C                | -2.350550000 | -0.824905000 | -0.861658000 | F                             | 1.519575000  | -0.173364000 | 1.315654000  |
| H                | -2.060731000 | -0.843140000 | -1.915109000 | F                             | 2.238758000  | -0.777246000 | -0.646022000 |
| H                | -2.451367000 | -1.854794000 | -0.519133000 | F                             | -1.519560000 | -0.173223000 | 1.315815000  |
| H                | -3.322017000 | -0.329655000 | -0.780710000 | F                             | -2.239174000 | -0.777142000 | -0.646042000 |
| C                | 2.350532000  | -0.824770000 | -0.861760000 |                               |              |              |              |
| H                | 3.322064000  | -0.329597000 | -0.781050000 |                               |              |              |              |
| H                | 2.451444000  | -1.854639000 | -0.519185000 |                               |              |              |              |
| H                | 2.060575000  | -0.843162000 | -1.915173000 |                               |              |              |              |
| C                | -1.703082000 | -0.156885000 | 1.451779000  |                               |              |              |              |
| H                | -2.743400000 | 0.152212000  | 1.588887000  |                               |              |              |              |
| H                | -1.602361000 | -1.187906000 | 1.798753000  |                               |              |              |              |
| H                | -1.081543000 | 0.480766000  | 2.083386000  |                               |              |              |              |
| C                | 1.703145000  | -0.156955000 | 1.451775000  |                               |              |              |              |
| H                | 1.603135000  | -1.188218000 | 1.798325000  |                               |              |              |              |
| H                | 2.743226000  | 0.152813000  | 1.589061000  |                               |              |              |              |
| H                | 1.081103000  | 0.479964000  | 2.083647000  |                               |              |              |              |
| <b>5 (X = H)</b> |              |              |              | <b>5 (X = CH<sub>3</sub>)</b> |              |              |              |
| C                | 0.572062000  | 1.596878000  | 0.376340000  | C                             | 1.675393000  | 0.949524000  | -0.589562000 |
| C                | 1.408213000  | 0.786733000  | -0.618437000 | C                             | 0.985253000  | 2.211162000  | -0.100484000 |
| C                | 1.796296000  | -0.603390000 | -0.112440000 | C                             | -0.519817000 | 2.237010000  | -0.315674000 |
| C                | -0.931043000 | 1.350349000  | 0.278034000  | C                             | 1.315922000  | -0.396330000 | 0.065896000  |
| C                | 0.652663000  | -1.603058000 | 0.009368000  | C                             | -1.274696000 | 1.248657000  | 0.563983000  |
| C                | -0.536696000 | -1.097805000 | 0.820828000  | C                             | -1.374644000 | -0.207663000 | 0.091808000  |
| H                | 0.923258000  | 1.387224000  | 1.395078000  | H                             | 1.510313000  | 0.838934000  | -1.669268000 |
| H                | 0.870732000  | 0.702531000  | -1.572401000 | H                             | 1.199183000  | 2.367568000  | 0.965725000  |
| H                | 2.282728000  | -0.489382000 | 0.866798000  | H                             | -0.747044000 | 2.056455000  | -1.374268000 |
| H                | 0.271946000  | -1.872475000 | -0.982837000 | H                             | -0.872291000 | 1.295094000  | 1.582211000  |
| H                | 0.733091000  | 2.669891000  | 0.228408000  | H                             | 2.757457000  | 1.076428000  | -0.463559000 |
| H                | 2.327371000  | 1.338856000  | -0.838572000 | H                             | 1.439176000  | 3.064034000  | -0.617105000 |
| H                | 2.559908000  | -1.026523000 | -0.773882000 | H                             | -0.889781000 | 3.245286000  | -0.101797000 |
| H                | 1.021808000  | -2.529808000 | 0.462198000  | H                             | -2.315597000 | 1.577296000  | 0.662991000  |
| N                | -1.269434000 | -0.061360000 | 0.098184000  | N                             | -0.070149000 | -0.829258000 | -0.345992000 |
| O                | -1.950961000 | -0.415632000 | -0.920945000 | O                             | -0.196562000 | -2.007910000 | -0.821787000 |
| H                | -1.356924000 | 1.849502000  | -0.594429000 | C                             | 1.441881000  | -0.367783000 | 1.590740000  |
| H                | -1.443763000 | 1.742683000  | 1.166985000  | H                             | 0.775612000  | 0.347824000  | 2.071487000  |
| H                | -1.244934000 | -1.908251000 | 1.012952000  | H                             | 1.233716000  | -1.358130000 | 2.003866000  |
| H                | -0.220465000 | -0.687911000 | 1.787824000  | H                             | 2.465229000  | -0.097445000 | 1.869657000  |
|                  |              |              |              | C                             | 2.289624000  | -1.439072000 | -0.474611000 |
|                  |              |              |              | H                             | 2.089190000  | -2.427763000 | -0.064077000 |
|                  |              |              |              | H                             | 2.229566000  | -1.514988000 | -1.561197000 |
|                  |              |              |              | H                             | 3.305049000  | -1.141563000 | -0.200349000 |
|                  |              |              |              | C                             | -2.306019000 | -0.286087000 | -1.119355000 |
|                  |              |              |              | H                             | -1.934982000 | 0.320254000  | -1.949435000 |
|                  |              |              |              | H                             | -2.390303000 | -1.315022000 | -1.466567000 |
|                  |              |              |              | H                             | -3.299663000 | 0.078284000  | -0.846212000 |
|                  |              |              |              | C                             | -1.939024000 | -1.066271000 | 1.225436000  |
|                  |              |              |              | H                             | -2.011137000 | -2.107225000 | 0.905652000  |
|                  |              |              |              | H                             | -1.305927000 | -1.018664000 | 2.115491000  |
|                  |              |              |              | H                             | -2.937456000 | -0.717457000 | 1.503936000  |
| <b>5 (X = F)</b> |              |              |              | <b>6 (X = H)</b>              |              |              |              |
| C                | -1.175775000 | 1.242190000  | 0.581692000  | C                             | -2.567604000 | 0.268336000  | 0.000015000  |
| C                | -0.296725000 | 2.069024000  | -0.358414000 | C                             | -1.597629000 | 1.277082000  | 0.000005000  |

|                               |              |              |              |                               |              |              |              |
|-------------------------------|--------------|--------------|--------------|-------------------------------|--------------|--------------|--------------|
| C                             | 1.200387000  | 1.968425000  | -0.062617000 | C                             | -2.196084000 | -1.078512000 | 0.000019000  |
| C                             | -1.355705000 | -0.195799000 | 0.142266000  | H                             | -1.893513000 | 2.322070000  | -0.000007000 |
| C                             | 1.867929000  | 0.643168000  | -0.416318000 | H                             | -2.965229000 | -1.844397000 | 0.000036000  |
| C                             | 1.180924000  | -0.563222000 | 0.169440000  | C                             | -0.261626000 | 0.922926000  | 0.000018000  |
| H                             | -0.770493000 | 1.244976000  | 1.595972000  | C                             | -0.858968000 | -1.454704000 | 0.000006000  |
| H                             | -0.503238000 | 1.794860000  | -1.400701000 | H                             | -0.540512000 | -2.490510000 | 0.000021000  |
| H                             | 1.365268000  | 2.182643000  | 0.999939000  | C                             | 0.087125000  | -0.430841000 | 0.000009000  |
| H                             | 1.879852000  | 0.480424000  | -1.498780000 | H                             | -3.619004000 | 0.534670000  | 0.000018000  |
| H                             | -2.185851000 | 1.655758000  | 0.642924000  | C                             | 2.130233000  | 0.756061000  | 0.000179000  |
| H                             | -0.591216000 | 3.117402000  | -0.264107000 | C                             | 0.981461000  | 1.771784000  | -0.000126000 |
| H                             | 1.725134000  | 2.755413000  | -0.611507000 | H                             | 1.018981000  | 2.425655000  | -0.876446000 |
| H                             | 2.905902000  | 0.629528000  | -0.073476000 | H                             | 1.018953000  | 2.426172000  | 0.875794000  |
| N                             | -0.135535000 | -0.819272000 | -0.444644000 | N                             | 1.466594000  | -0.567405000 | -0.000052000 |
| O                             | -0.118998000 | -1.120767000 | -1.674265000 | O                             | 2.108122000  | -1.653044000 | -0.000077000 |
| F                             | -1.764603000 | -0.967879000 | 1.183156000  | H                             | 2.774162000  | 0.814910000  | -0.881540000 |
| F                             | -2.298798000 | -0.281116000 | -0.811618000 | H                             | 2.773585000  | 0.814823000  | 0.882350000  |
| F                             | 0.979482000  | -0.427522000 | 1.509870000  |                               |              |              |              |
| F                             | 1.922715000  | -1.672671000 | -0.016956000 |                               |              |              |              |
| <b>6 (X = CH<sub>3</sub>)</b> |              |              |              | <b>6 (X = F)</b>              |              |              |              |
| C                             | 3.083488000  | -0.594348000 | 0.019851000  | C                             | 3.054890000  | -0.581160000 | 0.000310000  |
| C                             | 1.968418000  | -1.437992000 | -0.029775000 | C                             | 1.945464000  | -1.431390000 | -0.000101000 |
| C                             | 2.926369000  | 0.793987000  | 0.030785000  | C                             | 2.893462000  | 0.806312000  | 0.000238000  |
| H                             | 2.096798000  | -2.516592000 | -0.041861000 | H                             | 2.078598000  | -2.508863000 | 0.000010000  |
| H                             | 3.804864000  | 1.430032000  | 0.068843000  | H                             | 3.769535000  | 1.446007000  | 0.000454000  |
| C                             | 0.704470000  | -0.879882000 | -0.065431000 | C                             | 0.679897000  | -0.876596000 | -0.000531000 |
| C                             | 1.665284000  | 1.374994000  | -0.001884000 | C                             | 1.629374000  | 1.382082000  | -0.000116000 |
| H                             | 1.514250000  | 2.448258000  | 0.010567000  | H                             | 1.473255000  | 2.454527000  | -0.000101000 |
| C                             | 0.569710000  | 0.512570000  | -0.046444000 | C                             | 0.542379000  | 0.514156000  | -0.000422000 |
| H                             | 4.080289000  | -1.021619000 | 0.049995000  | H                             | 4.053872000  | -1.003807000 | 0.000730000  |
| C                             | -1.656712000 | -0.361224000 | 0.009246000  | C                             | -1.644804000 | -0.351624000 | 0.000123000  |
| C                             | -0.650909000 | -1.520388000 | -0.156716000 | C                             | -0.674058000 | -1.524618000 | -0.001346000 |
| H                             | -0.781426000 | -2.014002000 | -1.126950000 | H                             | -0.847219000 | -2.144004000 | -0.884353000 |
| H                             | -0.799426000 | -2.291114000 | 0.606119000  | H                             | -0.847801000 | -2.146281000 | 0.879888000  |
| N                             | -0.769400000 | 0.856765000  | -0.072351000 | N                             | -0.805890000 | 0.859219000  | -0.000584000 |
| O                             | -1.235428000 | 2.029380000  | -0.048647000 | O                             | -1.295199000 | 2.018736000  | -0.000193000 |
| C                             | -2.311563000 | -0.350616000 | 1.384483000  | F                             | -2.459054000 | -0.326555000 | -1.081198000 |
| H                             | -1.560759000 | -0.409015000 | 2.177356000  | F                             | -2.456175000 | -0.327331000 | 1.083428000  |
| H                             | -2.886020000 | 0.568166000  | 1.521934000  |                               |              |              |              |
| H                             | -2.987966000 | -1.202937000 | 1.489497000  |                               |              |              |              |
| C                             | -2.690259000 | -0.278843000 | -1.098831000 |                               |              |              |              |
| H                             | -3.280489000 | 0.634262000  | -0.997329000 |                               |              |              |              |
| H                             | -2.214613000 | -0.270831000 | -2.082881000 |                               |              |              |              |
| H                             | -3.366057000 | -1.136554000 | -1.051367000 |                               |              |              |              |
| <b>7 (X = H)</b>              |              |              |              | <b>7 (X = CH<sub>3</sub>)</b> |              |              |              |
| C                             | 1.195083000  | -1.226708000 | 0.000069000  | C                             | 0.709423000  | 1.258945000  | -0.000503000 |
| C                             | 1.195099000  | 1.226708000  | 0.000133000  | C                             | 0.709633000  | -1.258825000 | -0.000416000 |
| N                             | 1.999214000  | 0.000006000  | 0.000095000  | N                             | 1.504168000  | 0.000067000  | -0.004854000 |
| O                             | 3.260988000  | -0.000007000 | -0.000224000 | O                             | 2.768326000  | 0.000197000  | -0.002900000 |
| C                             | -1.396552000 | -1.403558000 | 0.000012000  | C                             | 1.038017000  | -2.064032000 | -1.255197000 |
| C                             | -2.595527000 | -0.696675000 | -0.000034000 | H                             | 0.474303000  | -3.000450000 | -1.269285000 |
| C                             | -0.200484000 | -0.698232000 | 0.000031000  | H                             | 0.792623000  | -1.501126000 | -2.158842000 |
| H                             | -3.537912000 | -1.234777000 | -0.000050000 | H                             | 2.104565000  | -2.299688000 | -1.272433000 |
| C                             | -2.595522000 | 0.696683000  | -0.000077000 | C                             | 1.039854000  | -2.056691000 | 1.258745000  |
| C                             | -0.200482000 | 0.698223000  | 0.000021000  | H                             | 0.796308000  | -1.488224000 | 2.159415000  |
| H                             | -3.537904000 | 1.234790000  | -0.000130000 | H                             | 0.475603000  | -2.992662000 | 1.279426000  |
| C                             | -1.396540000 | 1.403559000  | -0.000030000 | H                             | 2.106318000  | -2.292709000 | 1.275554000  |
| H                             | -1.399004000 | 2.489567000  | -0.000047000 |                               |              |              |              |

|                               |              |              |              |                  |              |              |              |
|-------------------------------|--------------|--------------|--------------|------------------|--------------|--------------|--------------|
| H                             | -1.399029000 | -2.489567000 | 0.000030000  | C                | 1.037906000  | 2.064110000  | -1.255150000 |
| H                             | 1.440141000  | 1.832302000  | 0.883124000  | H                | 0.792844000  | 1.501120000  | -2.158827000 |
| H                             | 1.440342000  | 1.832449000  | -0.882685000 | H                | 0.474062000  | 3.000458000  | -1.269449000 |
| H                             | 1.440218000  | -1.832392000 | 0.882966000  | H                | 2.104415000  | 2.300001000  | -1.272198000 |
| H                             | 1.440299000  | -1.832351000 | -0.882833000 | C                | 1.039247000  | 2.056778000  | 1.258857000  |
|                               |              |              |              | H                | 2.105581000  | 2.293419000  | 1.275792000  |
|                               |              |              |              | H                | 0.474587000  | 2.992496000  | 1.279795000  |
|                               |              |              |              | H                | 0.795937000  | 1.488052000  | 2.159417000  |
|                               |              |              |              | C                | -1.882411000 | 1.401197000  | -0.000366000 |
|                               |              |              |              | C                | -3.083029000 | 0.696710000  | 0.000090000  |
|                               |              |              |              | C                | -0.684670000 | 0.696807000  | -0.000658000 |
|                               |              |              |              | H                | -4.025044000 | 1.235312000  | 0.000319000  |
|                               |              |              |              | C                | -3.082940000 | -0.697050000 | 0.000176000  |
|                               |              |              |              | C                | -0.684560000 | -0.696891000 | -0.000590000 |
|                               |              |              |              | H                | -4.024891000 | -1.235764000 | 0.000538000  |
|                               |              |              |              | C                | -1.882238000 | -1.401403000 | -0.000211000 |
|                               |              |              |              | H                | -1.884042000 | -2.488263000 | -0.000190000 |
|                               |              |              |              | H                | -1.884347000 | 2.488059000  | -0.000513000 |
| <b>7 (X = F)</b>              |              |              |              | <b>8 (X = H)</b> |              |              |              |
| C                             | 0.724718000  | -1.214903000 | -0.000137000 | C                | 2.757039000  | -0.471876000 | 0.024247000  |
| C                             | 0.724738000  | 1.214735000  | -0.000227000 | C                | 1.688005000  | -1.358044000 | -0.061516000 |
| N                             | 1.534841000  | 0.000092000  | 0.000451000  | C                | 2.510794000  | 0.899891000  | 0.086535000  |
| O                             | 2.791440000  | 0.000140000  | 0.001068000  | H                | 1.873783000  | -2.428361000 | -0.102783000 |
| C                             | -1.855008000 | -1.413807000 | -0.000297000 | H                | 3.338299000  | 1.598765000  | 0.154468000  |
| C                             | -3.047824000 | -0.698247000 | 0.000084000  | C                | 0.370685000  | -0.912588000 | -0.093174000 |
| C                             | -0.670698000 | -0.694013000 | -0.001008000 | C                | 1.214189000  | 1.378672000  | 0.065442000  |
| H                             | -3.992529000 | -1.231427000 | 0.000503000  | H                | 0.989237000  | 2.436924000  | 0.112501000  |
| C                             | -3.047830000 | 0.698175000  | 0.000024000  | C                | 0.141535000  | 0.478838000  | -0.024820000 |
| C                             | -0.670725000 | 0.693897000  | -0.001085000 | H                | 3.774318000  | -0.847893000 | 0.047150000  |
| H                             | -3.992526000 | 1.231369000  | 0.000557000  | C                | -2.321254000 | 0.089596000  | -0.159018000 |
| C                             | -1.855011000 | 1.413717000  | -0.000444000 | C                | -2.031504000 | -1.270027000 | 0.441649000  |
| H                             | -1.846782000 | 2.498310000  | -0.000193000 | C                | -0.785476000 | -1.864512000 | -0.195689000 |
| H                             | -1.846796000 | -2.498401000 | 0.000042000  | H                | -2.899238000 | -1.919925000 | 0.300641000  |
| F                             | 1.023097000  | -1.977646000 | -1.079949000 | N                | -1.162573000 | 0.986402000  | -0.048652000 |
| F                             | 1.020956000  | -1.977694000 | 1.080107000  | O                | -1.385125000 | 2.237274000  | -0.040477000 |
| F                             | 1.022998000  | 1.977864000  | -1.079827000 | H                | -1.882934000 | -1.166334000 | 1.522453000  |
| F                             | 1.020622000  | 1.977594000  | 1.080328000  | H                | -0.989878000 | -2.086086000 | -1.252983000 |
|                               |              |              |              | H                | -0.523073000 | -2.820972000 | 0.265991000  |
|                               |              |              |              | H                | -3.142821000 | 0.607520000  | 0.337823000  |
|                               |              |              |              | H                | -2.582758000 | 0.003641000  | -1.222814000 |
| <b>8 (X = CH<sub>3</sub>)</b> |              |              |              | <b>8 (X = F)</b> |              |              |              |
| C                             | 3.271827000  | -0.377094000 | 0.195578000  | C                | 3.302039000  | -0.117040000 | 0.022362000  |
| C                             | 2.346302000  | 0.656901000  | 0.138269000  | C                | 2.311809000  | 0.854432000  | -0.025943000 |
| C                             | 2.834874000  | -1.695925000 | 0.072125000  | C                | 2.945361000  | -1.466193000 | 0.039016000  |
| H                             | 2.694863000  | 1.682879000  | 0.218211000  | H                | 2.567074000  | 1.908200000  | -0.042569000 |
| H                             | 3.547038000  | -2.513862000 | 0.108078000  | H                | 3.715640000  | -2.229216000 | 0.079504000  |
| C                             | 0.980897000  | 0.426153000  | -0.033026000 | C                | 0.969711000  | 0.494877000  | -0.062132000 |
| C                             | 1.490031000  | -1.967273000 | -0.084650000 | C                | 1.616172000  | -1.846998000 | 0.004043000  |
| H                             | 1.114765000  | -2.979309000 | -0.167725000 | H                | 1.314111000  | -2.886453000 | 0.017005000  |
| C                             | 0.557319000  | -0.916791000 | -0.125275000 | C                | 0.619642000  | -0.865440000 | -0.049832000 |
| H                             | 4.325571000  | -0.156461000 | 0.328204000  | H                | 4.346040000  | 0.173820000  | 0.046565000  |
| C                             | -1.845998000 | -0.225049000 | 0.071246000  | C                | -1.813462000 | -0.286782000 | -0.063958000 |
| C                             | -1.379668000 | 1.096230000  | -0.537297000 | C                | -1.404392000 | 1.042593000  | -0.643556000 |
| C                             | 0.019446000  | 1.599539000  | -0.151350000 | C                | -0.099749000 | 1.539483000  | -0.071939000 |
| H                             | -2.122764000 | 1.869838000  | -0.308868000 | H                | -2.198625000 | 1.768111000  | -0.463099000 |
| N                             | -0.801348000 | -1.250012000 | -0.242353000 | N                | -0.725302000 | -1.277671000 | -0.093011000 |



|                  |              |              |              |                               |              |              |              |
|------------------|--------------|--------------|--------------|-------------------------------|--------------|--------------|--------------|
| C                | -3.150140000 | -0.648080000 | -0.586467000 | O                             | -1.049262000 | -2.498576000 | -0.014548000 |
| H                | -3.915840000 | 0.103818000  | -0.379121000 | H                             | -1.283471000 | 0.916775000  | -1.721847000 |
| H                | -3.036959000 | -0.735062000 | -1.669289000 | F                             | 0.304492000  | 2.634005000  | -0.793090000 |
| H                | -3.490559000 | -1.609869000 | -0.205080000 | F                             | -0.303700000 | 2.004817000  | 1.207783000  |
| C                | -2.010834000 | -0.203045000 | 1.591665000  | F                             | -2.849141000 | -0.791863000 | -0.755529000 |
| H                | -1.056073000 | -0.074530000 | 2.104354000  | F                             | -2.226356000 | -0.159462000 | 1.225673000  |
| H                | -2.677893000 | 0.608207000  | 1.896489000  |                               |              |              |              |
| H                | -2.442381000 | -1.148658000 | 1.927925000  |                               |              |              |              |
| O                | -1.158373000 | -2.464306000 | -0.356796000 |                               |              |              |              |
| C                | 0.485885000  | 2.539279000  | -1.274380000 |                               |              |              |              |
| H                | 0.596984000  | 2.002731000  | -2.220318000 |                               |              |              |              |
| H                | -0.244872000 | 3.340859000  | -1.423415000 |                               |              |              |              |
| H                | 1.444135000  | 3.008823000  | -1.039787000 |                               |              |              |              |
| C                | -0.004951000 | 2.414034000  | 1.151196000  |                               |              |              |              |
| H                | -0.693165000 | 3.260160000  | 1.054430000  |                               |              |              |              |
| H                | -0.314455000 | 1.827742000  | 2.016273000  |                               |              |              |              |
| H                | 0.986327000  | 2.819870000  | 1.370797000  |                               |              |              |              |
| H                | -1.408246000 | 0.964083000  | -1.626133000 |                               |              |              |              |
| <b>9 (X = H)</b> |              |              |              | <b>9 (X = CH<sub>3</sub>)</b> |              |              |              |
| C                | -2.737713000 | 0.416169000  | 0.000722000  | C                             | -3.336328000 | 0.295085000  | 0.000047000  |
| C                | -1.702702000 | 1.343355000  | -0.000074000 | C                             | -2.352136000 | 1.275504000  | -0.000024000 |
| C                | -2.443030000 | -0.949161000 | 0.000988000  | C                             | -2.968040000 | -1.052272000 | 0.000057000  |
| H                | -1.920626000 | 2.407785000  | -0.000676000 | H                             | -2.625770000 | 2.326831000  | -0.000064000 |
| H                | -3.248519000 | -1.676460000 | 0.001661000  | H                             | -3.732661000 | -1.822636000 | 0.000147000  |
| C                | -0.367656000 | 0.938379000  | -0.000374000 | C                             | -0.997297000 | 0.941024000  | -0.000094000 |
| C                | -1.130261000 | -1.388065000 | 0.000530000  | C                             | -1.633440000 | -1.420264000 | 0.000003000  |
| H                | -0.872847000 | -2.439752000 | 0.000527000  | H                             | -1.322722000 | -2.457243000 | -0.000012000 |
| C                | -0.089907000 | -0.451144000 | 0.000194000  | C                             | -0.641963000 | -0.428959000 | -0.000058000 |
| H                | -3.768554000 | 0.752892000  | 0.001029000  | H                             | -4.383865000 | 0.575551000  | 0.000088000  |
| C                | 2.375210000  | 0.025587000  | 0.005008000  | C                             | 1.837911000  | 0.180126000  | 0.000019000  |
| C                | 2.004015000  | 1.463922000  | -0.000649000 | C                             | 1.341291000  | 1.592137000  | 0.000010000  |
| C                | 0.731979000  | 1.878456000  | -0.002318000 | C                             | 0.049512000  | 1.936762000  | -0.000046000 |
| H                | 2.826758000  | 2.171787000  | -0.002660000 | H                             | 2.120247000  | 2.350627000  | 0.000126000  |
| H                | 0.497004000  | 2.938592000  | -0.005922000 | H                             | -0.241749000 | 2.983277000  | -0.000025000 |
| N                | 1.228638000  | -0.896366000 | -0.001110000 | N                             | 0.698497000  | -0.801833000 | -0.000043000 |
| O                | 1.508302000  | -2.134362000 | -0.003799000 | C                             | 2.669617000  | -0.090351000 | 1.256860000  |
| H                | 2.984096000  | -0.233178000 | 0.883170000  | H                             | 3.539799000  | 0.570201000  | 1.276740000  |
| H                | 2.996192000  | -0.237200000 | -0.863136000 | H                             | 2.081982000  | 0.088830000  | 2.160148000  |
|                  |              |              |              | H                             | 3.012275000  | -1.126336000 | 1.259938000  |
|                  |              |              |              | C                             | 2.669725000  | -0.090343000 | -1.256733000 |
|                  |              |              |              | H                             | 2.082200000  | 0.088857000  | -2.160082000 |
|                  |              |              |              | H                             | 3.539938000  | 0.570171000  | -1.276513000 |
|                  |              |              |              | H                             | 3.012365000  | -1.126336000 | -1.259750000 |
|                  |              |              |              | O                             | 1.024422000  | -2.029957000 | -0.000084000 |
| <b>9 (X = F)</b> |              |              |              | <b>10 (X = H)</b>             |              |              |              |
| C                | 3.299036000  | 0.307620000  | -0.000005000 | C                             | -3.632612000 | 0.581964000  | -0.014220000 |
| C                | 2.313127000  | 1.282793000  | -0.000003000 | C                             | -2.412390000 | 1.231615000  | -0.004963000 |
| C                | 2.940625000  | -1.043002000 | 0.000028000  | C                             | -3.685335000 | -0.811598000 | -0.014610000 |
| H                | 2.580804000  | 2.335207000  | -0.000026000 | H                             | -2.333446000 | 2.311039000  | -0.005328000 |
| H                | 3.710587000  | -1.807372000 | 0.000047000  | H                             | -4.641752000 | -1.323722000 | -0.022855000 |
| C                | 0.958867000  | 0.937546000  | -0.000016000 | C                             | -1.229426000 | 0.483434000  | 0.004672000  |
| C                | 1.608954000  | -1.420114000 | 0.000028000  | C                             | -2.505522000 | -1.543608000 | -0.004541000 |
| H                | 1.304851000  | -2.459212000 | 0.000024000  | H                             | -2.541482000 | -2.630060000 | -0.004029000 |
| C                | 0.619398000  | -0.432716000 | 0.000003000  | C                             | -1.260042000 | -0.918422000 | 0.006182000  |
| H                | 4.344871000  | 0.593541000  | -0.000024000 | H                             | -4.548904000 | 1.162708000  | -0.021820000 |
| C                | -1.820293000 | 0.167015000  | -0.000021000 | C                             | 0.000003000  | -1.728991000 | 0.024656000  |

|                                |              |              |              |                                |              |              |              |
|--------------------------------|--------------|--------------|--------------|--------------------------------|--------------|--------------|--------------|
| C                              | -1.386592000 | 1.577619000  | -0.000040000 | N                              | -0.000003000 | 1.178651000  | 0.011691000  |
| C                              | -0.092841000 | 1.922944000  | -0.000021000 | O                              | -0.000009000 | 2.451069000  | 0.015460000  |
| H                              | -2.193636000 | 2.300615000  | 0.000039000  | C                              | 2.505523000  | -1.543606000 | -0.004560000 |
| H                              | 0.189461000  | 2.971466000  | 0.000043000  | C                              | 3.685337000  | -0.811595000 | -0.014636000 |
| N                              | -0.726285000 | -0.813166000 | -0.000025000 | C                              | 1.260046000  | -0.918417000 | 0.006217000  |
| O                              | -1.072386000 | -2.029577000 | -0.000028000 | H                              | 4.641754000  | -1.323717000 | -0.022888000 |
| F                              | -2.606422000 | -0.100239000 | -1.082889000 | C                              | 3.632615000  | 0.581966000  | -0.014213000 |
| F                              | -2.606417000 | -0.100172000 | 1.082952000  | C                              | 1.229425000  | 0.483437000  | 0.004715000  |
|                                |              |              |              | H                              | 4.548908000  | 1.162708000  | -0.021822000 |
|                                |              |              |              | C                              | 2.412392000  | 1.231617000  | -0.004931000 |
|                                |              |              |              | H                              | 2.333448000  | 2.311041000  | -0.005288000 |
|                                |              |              |              | H                              | 2.541484000  | -2.630058000 | -0.004098000 |
|                                |              |              |              | H                              | -0.000058000 | -2.380933000 | 0.909731000  |
|                                |              |              |              | H                              | 0.000064000  | -2.424897000 | -0.825733000 |
| <b>10 (X = CH<sub>3</sub>)</b> |              |              |              | <b>10 (X = F)</b>              |              |              |              |
| C                              | 3.631301000  | 0.969710000  | -0.000522000 | C                              | -3.625728000 | 0.914882000  | -0.000072000 |
| C                              | 2.406245000  | 1.608367000  | -0.000271000 | C                              | -2.415163000 | 1.580072000  | 0.000005000  |
| C                              | 3.689748000  | -0.423164000 | -0.000417000 | C                              | -3.669984000 | -0.481308000 | -0.000134000 |
| H                              | 2.318182000  | 2.686950000  | -0.000297000 | H                              | -2.349272000 | 2.660263000  | 0.000046000  |
| H                              | 4.647262000  | -0.932796000 | -0.000583000 | H                              | -4.623893000 | -0.997292000 | -0.000212000 |
| C                              | 1.226286000  | 0.852550000  | 0.000033000  | C                              | -1.225290000 | 0.842877000  | 0.000023000  |
| C                              | 2.513013000  | -1.159575000 | -0.000114000 | C                              | -2.489714000 | -1.207185000 | -0.000098000 |
| H                              | 2.569292000  | -2.244130000 | 0.000120000  | H                              | -2.506942000 | -2.291848000 | -0.000137000 |
| C                              | 1.257341000  | -0.549743000 | 0.000088000  | C                              | -1.256824000 | -0.557349000 | -0.000015000 |
| H                              | 4.543793000  | 1.556337000  | -0.000828000 | H                              | -4.547672000 | 1.486678000  | -0.000084000 |
| C                              | 0.000050000  | -1.402924000 | 0.000226000  | C                              | 0.000007000  | -1.356862000 | 0.000078000  |
| C                              | 0.000016000  | -2.295579000 | 1.255974000  | N                              | -0.000009000 | 1.539279000  | 0.000068000  |
| H                              | 0.000038000  | -1.692809000 | 2.167319000  | O                              | -0.000036000 | 2.809924000  | 0.000133000  |
| H                              | -0.882053000 | -2.940223000 | 1.276771000  | C                              | 2.489724000  | -1.207169000 | -0.000024000 |
| H                              | 0.882273000  | -2.940031000 | 1.277020000  | C                              | 3.669990000  | -0.481288000 | -0.000080000 |
| C                              | 0.000191000  | -2.296561000 | -1.254893000 | C                              | 1.256831000  | -0.557338000 | 0.000015000  |
| H                              | 0.000401000  | -1.694007000 | -2.166392000 | H                              | 4.623901000  | -0.997271000 | -0.000097000 |
| H                              | 0.882432000  | -2.940963000 | -1.275345000 | C                              | 3.625726000  | 0.914901000  | -0.000117000 |
| H                              | -0.882036000 | -2.940994000 | -1.275657000 | C                              | 1.225285000  | 0.842890000  | 0.000004000  |
| N                              | -0.000094000 | 1.549231000  | 0.000287000  | H                              | 4.547668000  | 1.486697000  | -0.000186000 |
| O                              | -0.000089000 | 2.821064000  | 0.000714000  | C                              | 2.415158000  | 1.580088000  | -0.000075000 |
| C                              | -2.512904000 | -1.159629000 | -0.000348000 | H                              | 2.349266000  | 2.660277000  | -0.000095000 |
| C                              | -3.689722000 | -0.423349000 | -0.000484000 | H                              | 2.506955000  | -2.291832000 | -0.000012000 |
| C                              | -1.257264000 | -0.549764000 | -0.000126000 | F                              | 0.000027000  | -2.218600000 | -1.087842000 |
| H                              | -4.647155000 | -0.933129000 | -0.000671000 | F                              | -0.000001000 | -2.218431000 | 1.088084000  |
| C                              | -3.631415000 | 0.969517000  | -0.000404000 |                                |              |              |              |
| C                              | -1.226426000 | 0.852528000  | 0.000011000  |                                |              |              |              |
| H                              | -4.543943000 | 1.556088000  | -0.000538000 |                                |              |              |              |
| C                              | -2.406391000 | 1.608271000  | -0.000134000 |                                |              |              |              |
| H                              | -2.318420000 | 2.686859000  | -0.000030000 |                                |              |              |              |
| H                              | -2.569106000 | -2.244206000 | -0.000322000 |                                |              |              |              |
| <b>11 (X = H)</b>              |              |              |              | <b>11 (X = CH<sub>3</sub>)</b> |              |              |              |
| C                              | 0.015603000  | -1.209555000 | -0.136461000 | C                              | -1.350912000 | -0.373718000 | 0.002171000  |
| C                              | 1.383919000  | -0.660703000 | 0.212397000  | C                              | -0.310446000 | -1.452912000 | 0.287251000  |
| C                              | -0.009959000 | 1.197451000  | 0.076968000  | C                              | 0.976083000  | 0.490117000  | -0.023467000 |
| H                              | 1.537609000  | -0.703615000 | 1.303692000  | H                              | -0.198069000 | -1.599811000 | 1.379604000  |
| H                              | 2.199996000  | -1.203382000 | -0.268564000 | H                              | -0.577031000 | -2.421525000 | -0.148521000 |
| N                              | -0.818837000 | -0.018254000 | 0.013268000  | N                              | -0.467481000 | 0.818865000  | -0.007487000 |
| O                              | -2.080705000 | -0.021063000 | 0.026499000  | O                              | -0.897007000 | 2.007515000  | 0.024304000  |
| N                              | 1.301773000  | 0.708517000  | -0.308069000 | C                              | 1.671830000  | 1.261793000  | -1.128374000 |
| H                              | -0.038063000 | -1.576004000 | -1.169880000 |                                |              |              |              |

|                                |              |              |              |                   |              |              |              |
|--------------------------------|--------------|--------------|--------------|-------------------|--------------|--------------|--------------|
| H                              | -0.34022000  | -1.996919000 | 0.531730000  | H                 | 2.737774000  | 1.021781000  | -1.155237000 |
| H                              | -0.400147000 | 1.941811000  | -0.625048000 | H                 | 1.231848000  | 1.015765000  | -2.096204000 |
| H                              | -0.071082000 | 1.616630000  | 1.099121000  | H                 | 1.565595000  | 2.334364000  | -0.954138000 |
| H                              | 2.039623000  | 1.294984000  | 0.063142000  | C                 | 1.564552000  | 0.828573000  | 1.348035000  |
|                                |              |              |              | H                 | 1.114881000  | 0.220127000  | 2.137830000  |
|                                |              |              |              | H                 | 2.646720000  | 0.675021000  | 1.365346000  |
|                                |              |              |              | H                 | 1.363825000  | 1.877796000  | 1.574538000  |
|                                |              |              |              | C                 | -1.988156000 | -0.525322000 | -1.376228000 |
|                                |              |              |              | H                 | -1.221970000 | -0.691370000 | -2.137091000 |
|                                |              |              |              | H                 | -2.683640000 | -1.369348000 | -1.390340000 |
|                                |              |              |              | H                 | -2.542884000 | 0.380331000  | -1.632279000 |
|                                |              |              |              | C                 | -2.399687000 | -0.225796000 | 1.089067000  |
|                                |              |              |              | H                 | -3.028277000 | 0.644091000  | 0.889215000  |
|                                |              |              |              | H                 | -3.038025000 | -1.112364000 | 1.127189000  |
|                                |              |              |              | H                 | -1.935744000 | -0.090228000 | 2.069387000  |
|                                |              |              |              | N                 | 0.902526000  | -0.944378000 | -0.336014000 |
|                                |              |              |              | C                 | 2.083483000  | -1.714344000 | -0.024219000 |
|                                |              |              |              | H                 | 2.286883000  | -1.798388000 | 1.058012000  |
|                                |              |              |              | H                 | 1.967748000  | -2.726742000 | -0.420016000 |
|                                |              |              |              | H                 | 2.960616000  | -1.271375000 | -0.502635000 |
| <b>11 (X = F)</b>              |              |              |              | <b>12 (X = H)</b> |              |              |              |
| C                              | -1.298298000 | -0.364003000 | 0.009855000  | C                 | -0.007580000 | -1.183513000 | 0.054966000  |
| C                              | -0.271740000 | -1.480079000 | 0.102378000  | C                 | -0.049882000 | 1.206836000  | -0.158098000 |
| C                              | 0.946788000  | 0.492176000  | -0.014814000 | C                 | -1.380482000 | 0.598673000  | 0.243435000  |
| H                              | -0.086808000 | -1.725626000 | 1.153635000  | H                 | -2.249411000 | 1.059293000  | -0.225811000 |
| H                              | -0.574669000 | -2.366893000 | -0.451377000 | H                 | -1.512070000 | 0.617519000  | 1.334978000  |
| N                              | -0.470642000 | 0.832553000  | 0.002904000  | N                 | 0.815254000  | 0.022795000  | -0.110932000 |
| O                              | -0.906900000 | 2.008666000  | -0.022400000 | O                 | 2.059561000  | 0.047272000  | 0.099029000  |
| N                              | 0.897387000  | -0.855171000 | -0.524474000 | O                 | -1.306516000 | -0.751843000 | -0.219839000 |
| F                              | 1.476842000  | 0.587179000  | 1.226709000  | H                 | 0.111215000  | -1.560288000 | 1.086335000  |
| F                              | 1.636653000  | 1.306916000  | -0.798621000 | H                 | 0.281793000  | -1.961348000 | -0.656498000 |
| F                              | -2.044727000 | -0.419963000 | -1.112580000 | H                 | 0.328874000  | 1.962665000  | 0.532738000  |
| F                              | -2.156373000 | -0.347579000 | 1.044650000  | H                 | -0.063876000 | 1.627195000  | -1.170560000 |
| F                              | 2.050823000  | -1.538447000 | -0.077556000 |                   |              |              |              |
| <b>12 (X = CH<sub>3</sub>)</b> |              |              |              | <b>12 (X = F)</b> |              |              |              |
| C                              | -1.226272000 | -0.128383000 | 0.005994000  | C                 | 1.185939000  | -0.122144000 | -0.025445000 |
| C                              | 1.238597000  | -0.137268000 | -0.010279000 | C                 | -1.200411000 | -0.110458000 | 0.000172000  |
| C                              | 0.596754000  | -1.466130000 | -0.405587000 | C                 | -0.619238000 | -1.496623000 | 0.196773000  |
| H                              | 1.112842000  | -2.336319000 | 0.005069000  | H                 | -1.108215000 | -2.245849000 | -0.422383000 |
| H                              | 0.552713000  | -1.570797000 | -1.500567000 | H                 | -0.670589000 | -1.777831000 | 1.252259000  |
| N                              | 0.009919000  | 0.692772000  | 0.053820000  | N                 | -0.008372000 | 0.714696000  | -0.008260000 |
| O                              | 0.005108000  | 1.956031000  | 0.090092000  | O                 | 0.001598000  | 1.970349000  | 0.034158000  |
| C                              | 2.186009000  | 0.426011000  | -1.051744000 | O                 | 0.743709000  | -1.389910000 | -0.231734000 |
| H                              | 3.083056000  | -0.193634000 | -1.131049000 | F                 | 2.026559000  | 0.235393000  | -0.990416000 |
| H                              | 1.708573000  | 0.473373000  | -2.033985000 | F                 | 1.857446000  | 0.004318000  | 1.142641000  |
| H                              | 2.488901000  | 1.438072000  | -0.775762000 | F                 | -2.037166000 | 0.259924000  | 0.984637000  |
| C                              | 1.877871000  | -0.186016000 | 1.374290000  | F                 | -1.882704000 | 0.028438000  | -1.161355000 |
| H                              | 1.205214000  | -0.655716000 | 2.096343000  |                   |              |              |              |
| H                              | 2.811366000  | -0.755626000 | 1.350760000  |                   |              |              |              |
| H                              | 2.102270000  | 0.826185000  | 1.719239000  |                   |              |              |              |
| C                              | -1.913584000 | 0.069901000  | -1.336301000 |                   |              |              |              |
| H                              | -1.255874000 | -0.216817000 | -2.160222000 |                   |              |              |              |
| H                              | -2.823626000 | -0.530994000 | -1.389093000 |                   |              |              |              |
| H                              | -2.175258000 | 1.122803000  | -1.463089000 |                   |              |              |              |
| C                              | -2.124898000 | 0.191554000  | 1.176999000  |                   |              |              |              |

|                                |              |              |              |                                |              |              |              |
|--------------------------------|--------------|--------------|--------------|--------------------------------|--------------|--------------|--------------|
| H                              | -2.411027000 | 1.244264000  | 1.139180000  |                                |              |              |              |
| H                              | -3.026676000 | -0.422428000 | 1.142000000  |                                |              |              |              |
| H                              | -1.604710000 | 0.002185000  | 2.117321000  |                                |              |              |              |
| O                              | -0.710614000 | -1.442526000 | 0.158268000  |                                |              |              |              |
| <b>13 (X = H)</b>              |              |              |              | <b>13 (X = CH<sub>3</sub>)</b> |              |              |              |
| C                              | 1.434317000  | 0.992718000  | -0.318254000 | C                              | -0.971757000 | 1.538734000  | -0.529621000 |
| C                              | 1.599153000  | -0.455083000 | 0.191418000  | C                              | 0.417822000  | 1.766419000  | 0.105759000  |
| H                              | 1.474002000  | 0.987845000  | -1.414747000 | H                              | -0.866687000 | 1.562970000  | -1.623210000 |
| H                              | 2.350963000  | -1.068832000 | -0.313965000 | H                              | 1.040996000  | 2.533985000  | -0.365433000 |
| H                              | 1.811517000  | -0.471634000 | 1.265285000  | H                              | 0.330192000  | 2.018145000  | 1.167887000  |
| H                              | 2.297522000  | 1.570181000  | 0.023492000  | H                              | -1.611122000 | 2.386845000  | -0.263961000 |
| N                              | -0.960896000 | 0.322276000  | 0.003234000  | N                              | -0.226733000 | -0.797468000 | -0.089822000 |
| O                              | -2.225698000 | 0.286809000  | -0.071654000 | O                              | -0.089570000 | -2.073517000 | -0.075122000 |
| B                              | 0.030796000  | 1.578776000  | 0.243492000  | C                              | 2.171563000  | -0.367630000 | 1.420581000  |
| P                              | -0.050778000 | -1.132499000 | -0.020754000 | H                              | 3.147624000  | 0.119760000  | 1.442612000  |
| H                              | -0.432132000 | -2.070765000 | 0.959169000  | H                              | 1.625580000  | -0.146488000 | 2.338485000  |
| H                              | -0.197055000 | -1.879803000 | -1.208804000 | H                              | 2.306644000  | -1.450142000 | 1.349169000  |
| H                              | -0.432612000 | 2.509116000  | -0.351978000 | C                              | 2.199619000  | -0.090756000 | -1.464771000 |
| H                              | 0.066521000  | 1.741288000  | 1.447000000  | H                              | 1.670543000  | 0.304760000  | -2.332845000 |
|                                |              |              |              | H                              | 3.170924000  | 0.399182000  | -1.372925000 |
|                                |              |              |              | H                              | 2.347044000  | -1.164247000 | -1.604655000 |
|                                |              |              |              | C                              | -2.027661000 | 0.135051000  | 1.540069000  |
|                                |              |              |              | H                              | -1.269504000 | 0.555360000  | 2.218591000  |
|                                |              |              |              | H                              | -2.933798000 | 0.736743000  | 1.682000000  |
|                                |              |              |              | H                              | -2.252950000 | -0.871040000 | 1.912203000  |
|                                |              |              |              | C                              | -2.679547000 | -0.545701000 | -0.999511000 |
|                                |              |              |              | H                              | -2.949965000 | -1.562301000 | -0.693781000 |
|                                |              |              |              | H                              | -3.607313000 | 0.039166000  | -1.001885000 |
|                                |              |              |              | H                              | -2.340568000 | -0.606205000 | -2.041365000 |
|                                |              |              |              | B                              | -1.590478000 | 0.106030000  | -0.021958000 |
|                                |              |              |              | P                              | 1.185880000  | 0.144471000  | 0.006240000  |
| <b>13 (X = F)</b>              |              |              |              | <b>14 (X = H)</b>              |              |              |              |
| C                              | -0.967709000 | 1.521829000  | -0.516686000 | N                              | -1.441165000 | -0.710462000 | -0.001531000 |
| C                              | 0.423736000  | 1.686981000  | 0.132285000  | C                              | -0.082370000 | -1.186810000 | 0.001254000  |
| H                              | -0.869704000 | 1.537239000  | -1.606364000 | C                              | -1.425680000 | 0.564214000  | -0.000994000 |
| H                              | 1.085686000  | 2.429546000  | -0.321482000 | C                              | -0.079983000 | 1.209330000  | 0.001266000  |
| H                              | 0.340252000  | 1.911890000  | 1.201254000  | N                              | 0.761780000  | 0.017763000  | 0.002358000  |
| H                              | -1.582487000 | 2.380547000  | -0.236623000 | H                              | -2.355022000 | 1.131764000  | -0.003982000 |
| N                              | -0.204640000 | -0.890618000 | -0.084056000 | O                              | 2.023533000  | 0.016427000  | -0.002363000 |
| O                              | -0.171879000 | -2.163437000 | -0.114629000 | H                              | 0.107850000  | 1.835090000  | -0.882003000 |
| B                              | -1.612419000 | 0.135902000  | -0.005140000 | H                              | 0.103784000  | 1.834237000  | 0.886049000  |
| P                              | 1.129813000  | 0.068509000  | 0.007651000  | H                              | 0.117409000  | -1.801800000 | 0.887748000  |
| F                              | 2.124044000  | -0.279483000 | 1.171119000  | H                              | 0.121606000  | -1.802221000 | -0.883852000 |
| F                              | 2.140407000  | -0.034036000 | -1.196382000 |                                |              |              |              |
| F                              | -1.919750000 | 0.139408000  | 1.343290000  |                                |              |              |              |
| F                              | -2.543312000 | -0.456712000 | -0.797362000 |                                |              |              |              |
| <b>14 (X = CH<sub>3</sub>)</b> |              |              |              | <b>14 (X = F)</b>              |              |              |              |
| N                              | -0.715234000 | -1.538461000 | -0.007684000 | N                              | -0.719347000 | -1.513749000 | 0.001177000  |
| C                              | -1.227519000 | -0.173794000 | -0.000568000 | C                              | -1.185064000 | -0.149301000 | -0.000405000 |
| C                              | 0.557171000  | -1.514437000 | -0.007529000 | C                              | 0.550745000  | -1.501381000 | 0.001404000  |
| C                              | 1.228676000  | -0.169942000 | -0.000538000 | C                              | 1.186529000  | -0.134441000 | -0.000295000 |
| N                              | 0.007533000  | 0.660806000  | 0.005349000  | N                              | 0.008888000  | 0.699308000  | -0.002609000 |
| H                              | 1.132687000  | -2.442182000 | -0.012474000 | H                              | 1.146507000  | -2.410965000 | 0.002502000  |

|                   |              |              |              |                                |              |              |              |
|-------------------|--------------|--------------|--------------|--------------------------------|--------------|--------------|--------------|
| O                 | 0.012807000  | 1.925295000  | 0.009121000  | O                              | 0.006102000  | 1.956819000  | -0.000672000 |
| C                 | -2.033945000 | 0.091883000  | 1.260668000  | F                              | -1.933425000 | 0.091827000  | 1.081680000  |
| H                 | -2.310527000 | 1.147602000  | 1.298049000  | F                              | -1.935392000 | 0.089360000  | -1.081152000 |
| H                 | -2.940350000 | -0.515875000 | 1.267726000  | F                              | 1.961237000  | 0.083930000  | -1.082977000 |
| H                 | -1.448761000 | -0.145906000 | 2.151580000  | F                              | 1.959205000  | 0.086911000  | 1.083414000  |
| C                 | -2.031597000 | 0.105654000  | -1.260345000 |                                |              |              |              |
| H                 | -1.444738000 | -0.122168000 | -2.152777000 |                                |              |              |              |
| H                 | -2.937701000 | -0.502398000 | -1.275783000 |                                |              |              |              |
| H                 | -2.308553000 | 1.161575000  | -1.286642000 |                                |              |              |              |
| C                 | 2.049241000  | 0.100072000  | -1.258903000 |                                |              |              |              |
| H                 | 2.948922000  | -0.520068000 | -1.278940000 |                                |              |              |              |
| H                 | 1.468642000  | -0.100294000 | -2.162309000 |                                |              |              |              |
| H                 | 2.351797000  | 1.149831000  | -1.272893000 |                                |              |              |              |
| C                 | 2.051604000  | 0.086148000  | 1.259167000  |                                |              |              |              |
| H                 | 1.472488000  | -0.123578000 | 2.161382000  |                                |              |              |              |
| H                 | 2.951149000  | -0.534417000 | 1.271008000  |                                |              |              |              |
| H                 | 2.354611000  | 1.135602000  | 1.283741000  |                                |              |              |              |
| <b>15 (X = H)</b> |              |              |              | <b>15 (X = CH<sub>3</sub>)</b> |              |              |              |
| N                 | 0.788300000  | 0.005712000  | 0.000024000  | N                              | -0.963591000 | 0.598538000  | -0.172126000 |
| C                 | -1.479610000 | -0.513466000 | 0.000036000  | C                              | 0.939071000  | -0.724197000 | -0.034687000 |
| C                 | -0.100610000 | -1.176710000 | -0.000056000 | C                              | 0.505086000  | 0.771048000  | 0.074464000  |
| C                 | -0.006936000 | 1.142224000  | 0.000017000  | C                              | -1.304464000 | -0.731503000 | 0.079020000  |
| N                 | -1.274409000 | 0.942640000  | -0.000067000 | N                              | -0.291227000 | -1.508866000 | 0.245395000  |
| O                 | 2.045118000  | -0.042281000 | 0.000006000  | C                              | 2.033240000  | -1.123526000 | 0.942090000  |
| H                 | 0.483619000  | 2.108966000  | 0.000026000  | H                              | 2.284617000  | -2.176594000 | 0.799164000  |
| H                 | 0.117479000  | -1.779161000 | -0.885124000 | H                              | 2.940138000  | -0.532674000 | 0.776433000  |
| H                 | 0.117423000  | -1.779287000 | 0.884953000  | H                              | 1.724503000  | -0.995399000 | 1.980478000  |
| H                 | -2.077104000 | -0.781585000 | -0.875875000 | C                              | 1.362801000  | -1.102607000 | -1.454871000 |
| H                 | -2.076666000 | -0.781443000 | 0.876297000  | H                              | 0.599027000  | -0.829710000 | -2.187938000 |
|                   |              |              |              | H                              | 2.300605000  | -0.614608000 | -1.735061000 |
|                   |              |              |              | H                              | 1.507384000  | -2.183231000 | -1.512491000 |
|                   |              |              |              | C                              | -2.734633000 | -1.102072000 | 0.134127000  |
|                   |              |              |              | H                              | -3.251913000 | -0.525234000 | 0.904860000  |
|                   |              |              |              | H                              | -3.225522000 | -0.860781000 | -0.812078000 |
|                   |              |              |              | H                              | -2.835741000 | -2.166057000 | 0.337625000  |
|                   |              |              |              | C                              | 1.094647000  | 1.732952000  | -0.936792000 |
|                   |              |              |              | H                              | 2.172541000  | 1.829523000  | -0.779951000 |
|                   |              |              |              | H                              | 0.923235000  | 1.412943000  | -1.965135000 |
|                   |              |              |              | H                              | 0.643319000  | 2.720018000  | -0.814508000 |
|                   |              |              |              | C                              | 0.634601000  | 1.343539000  | 1.484557000  |
|                   |              |              |              | H                              | 1.682785000  | 1.507781000  | 1.745108000  |
|                   |              |              |              | H                              | 0.113820000  | 2.302849000  | 1.532829000  |
|                   |              |              |              | H                              | 0.195145000  | 0.678297000  | 2.231767000  |
|                   |              |              |              | O                              | -1.771539000 | 1.552921000  | -0.342679000 |
| <b>15 (X = F)</b> |              |              |              | <b>16 (X = H)</b>              |              |              |              |
| N                 | 1.031065000  | 0.566816000  | -0.000028000 | N                              | 0.947865000  | -1.365293000 | -0.003359000 |
| C                 | -0.948843000 | -0.681673000 | -0.000023000 | C                              | 1.755638000  | -0.172994000 | 0.192709000  |
| C                 | -0.425327000 | 0.796685000  | -0.000034000 | C                              | 1.111236000  | 1.095160000  | -0.343443000 |
| C                 | 1.212996000  | -0.815144000 | -0.000041000 | C                              | -0.288574000 | 1.239776000  | 0.217870000  |
| N                 | 0.182245000  | -1.561435000 | -0.000011000 | C                              | -0.320232000 | -1.214844000 | -0.089422000 |
| O                 | 1.907687000  | 1.462629000  | 0.000060000  | H                              | 1.706997000  | 1.978502000  | -0.098887000 |
| F                 | 2.436918000  | -1.233585000 | -0.000018000 | H                              | 1.058725000  | 1.038590000  | -1.436285000 |
| F                 | -0.779820000 | 1.485451000  | -1.083042000 | N                              | -1.023707000 | -0.017222000 | 0.015746000  |
| F                 | -0.779831000 | 1.485496000  | 1.082964000  | O                              | -2.291810000 | -0.001375000 | -0.023770000 |
| F                 | -1.704538000 | -0.898530000 | 1.087845000  | H                              | -0.985072000 | -2.062745000 | -0.246294000 |
| F                 | -1.704686000 | -0.898599000 | -1.087707000 | H                              | -0.872922000 | 2.021983000  | -0.269601000 |

|                                |              |              |              |              |
|--------------------------------|--------------|--------------|--------------|--------------|
|                                | H            | -0.276651000 | 1.454162000  | 1.293723000  |
|                                | H            | 1.957015000  | -0.077507000 | 1.269470000  |
|                                | H            | 2.728867000  | -0.346969000 | -0.274968000 |
| <b>16 (X = CH<sub>3</sub>)</b> |              |              |              |              |
| N                              | -1.215567000 | 1.368621000  | -0.127497000 |              |
| C                              | -1.538487000 | -0.061571000 | -0.053084000 |              |
| C                              | -0.392874000 | -0.928212000 | -0.595993000 |              |
| C                              | 1.019190000  | -0.606743000 | -0.093678000 |              |
| C                              | 0.013584000  | 1.712830000  | -0.071148000 |              |
| H                              | -0.598041000 | -1.989327000 | -0.411400000 |              |
| H                              | -0.391781000 | -0.805125000 | -1.685921000 |              |
| N                              | 1.128399000  | 0.881397000  | 0.019153000  |              |
| O                              | 2.278513000  | 1.395537000  | 0.185101000  |              |
| C                              | 2.048997000  | -1.062669000 | -1.123250000 |              |
| H                              | 1.879757000  | -0.581544000 | -2.089541000 |              |
| H                              | 3.060367000  | -0.824158000 | -0.792533000 |              |
| H                              | 1.970275000  | -2.144013000 | -1.261346000 |              |
| C                              | 1.362894000  | -1.216899000 | 1.263132000  |              |
| H                              | 1.333862000  | -2.307424000 | 1.192002000  |              |
| H                              | 2.371886000  | -0.919704000 | 1.556696000  |              |
| H                              | 0.675505000  | -0.912081000 | 2.051441000  |              |
| C                              | -1.898738000 | -0.357531000 | 1.406393000  |              |
| H                              | -2.099390000 | -1.423853000 | 1.548558000  |              |
| H                              | -1.107400000 | -0.059116000 | 2.095366000  |              |
| H                              | -2.795448000 | 0.200269000  | 1.685150000  |              |
| C                              | -2.774677000 | -0.291141000 | -0.919723000 |              |
| H                              | -3.599583000 | 0.335396000  | -0.574504000 |              |
| H                              | -2.573114000 | -0.036437000 | -1.963018000 |              |
| H                              | -3.091406000 | -1.337661000 | -0.877687000 |              |
| H                              | 0.307249000  | 2.761978000  | -0.071550000 |              |
| <b>16 (X = F)</b>              |              |              |              |              |
| N                              | -1.160190000 | 1.376676000  | -0.064073000 |              |
| C                              | -1.486492000 | -0.012256000 | -0.057442000 |              |
| C                              | -0.436422000 | -0.939836000 | -0.634588000 |              |
| C                              | 0.933094000  | -0.645908000 | -0.081337000 |              |
| C                              | 0.076695000  | 1.689241000  | -0.035212000 |              |
| H                              | -0.693666000 | -1.982043000 | -0.442119000 |              |
| H                              | -0.402873000 | -0.782761000 | -1.714717000 |              |
| N                              | 1.166081000  | 0.814263000  | -0.029654000 |              |
| O                              | 2.350039000  | 1.243868000  | 0.073914000  |              |
| H                              | 0.399550000  | 2.727986000  | -0.008274000 |              |
| F                              | 1.102322000  | -1.132053000 | 1.169178000  |              |
| F                              | 1.890195000  | -1.187825000 | -0.850900000 |              |
| F                              | -2.633608000 | -0.177629000 | -0.763386000 |              |
| F                              | -1.766221000 | -0.368954000 | 1.231925000  |              |
| <b>17 (X = H)</b>              |              |              |              |              |
| N                              | 0.952245000  | 0.041306000  | 0.000066000  |              |
| C                              | 0.210155000  | -1.250713000 | 0.000221000  |              |
| N                              | -1.210805000 | -1.133163000 | -0.000147000 |              |
| C                              | -1.717867000 | 0.043369000  | -0.000019000 |              |
| C                              | 0.237527000  | 1.207025000  | 0.000154000  |              |
| N                              | -1.060284000 | 1.268385000  | 0.000068000  |              |
| H                              | 0.858059000  | 2.100741000  | 0.000111000  |              |
| O                              | 2.211932000  | 0.021094000  | -0.000273000 |              |
| H                              | -2.803250000 | 0.121031000  | -0.000978000 |              |
| H                              | 0.551619000  | -1.812443000 | -0.878827000 |              |
| H                              | 0.551133000  | -1.811867000 | 0.879834000  |              |
| <b>17 (X = CH<sub>3</sub>)</b> |              |              |              |              |
| N                              | 0.059653000  | 0.955990000  | -0.000021000 |              |
| C                              | 0.647705000  | -0.447478000 | 0.000000000  |              |
| N                              | -0.375437000 | -1.464374000 | -0.000062000 |              |
| C                              | -1.608900000 | -1.123445000 | -0.000036000 |              |
| C                              | -1.295453000 | 1.124555000  | -0.000005000 |              |
| N                              | -2.158045000 | 0.153524000  | -0.000004000 |              |
| C                              | 1.490601000  | -0.579546000 | -1.262020000 |              |
| H                              | 1.964474000  | -1.561500000 | -1.273780000 |              |
| H                              | 0.868189000  | -0.487151000 | -2.154286000 |              |
| H                              | 2.257768000  | 0.196053000  | -1.281003000 |              |
| C                              | 1.490421000  | -0.579510000 | 1.262148000  |              |
| H                              | 2.257526000  | 0.196147000  | 1.281188000  |              |
| H                              | 0.867870000  | -0.487129000 | 2.154316000  |              |
| H                              | 1.964384000  | -1.561421000 | 1.273994000  |              |
| H                              | -1.605194000 | 2.168049000  | 0.000002000  |              |
| O                              | 0.843052000  | 1.946997000  | -0.000037000 |              |
| H                              | -2.348878000 | -1.922461000 | -0.000047000 |              |
| <b>17 (X = F)</b>              |              |              |              |              |
| N                              | -0.188559000 | 0.923778000  | -0.000309000 |              |
| C                              | -0.604901000 | -0.510010000 | 0.000408000  |              |
| N                              | 0.448804000  | -1.430341000 | 0.000271000  |              |
| C                              | 1.653438000  | -0.983903000 | -0.001498000 |              |
| <b>18 (X = H)</b>              |              |              |              |              |
| C                              | 0.648071000  | -1.574883000 | -0.015095000 |              |
| N                              | 1.756763000  | -0.651810000 | -0.159111000 |              |
| C                              | 1.420474000  | 0.686692000  | -0.630030000 |              |
| C                              | -0.544990000 | -1.089106000 | 0.819079000  |              |

|                                |              |              |              |                                |              |              |              |
|--------------------------------|--------------|--------------|--------------|--------------------------------|--------------|--------------|--------------|
| C                              | 1.155657000  | 1.222659000  | 0.001023000  | C                              | 0.628875000  | 1.571339000  | 0.346470000  |
| N                              | 2.089015000  | 0.330738000  | 0.000488000  | C                              | -0.885201000 | 1.367778000  | 0.307568000  |
| H                              | 1.363511000  | 2.290370000  | 0.002909000  | H                              | 0.260849000  | -1.820758000 | -1.011356000 |
| O                              | -1.070717000 | 1.823487000  | -0.001664000 | H                              | 0.867842000  | 0.580463000  | -1.572069000 |
| H                              | 2.453203000  | -1.721215000 | -0.002117000 | H                              | 1.012576000  | 1.397744000  | 1.360208000  |
| F                              | -1.384568000 | -0.683732000 | -1.084528000 | H                              | 1.033061000  | -2.504985000 | 0.414844000  |
| F                              | -1.384427000 | -0.682797000 | 1.085615000  | H                              | 2.360848000  | 1.188629000  | -0.879342000 |
|                                |              |              |              | H                              | 0.825979000  | 2.628620000  | 0.136035000  |
|                                |              |              |              | N                              | -1.269950000 | -0.033332000 | 0.122277000  |
|                                |              |              |              | O                              | -1.935359000 | -0.361874000 | -0.917055000 |
|                                |              |              |              | H                              | -1.250734000 | -1.908709000 | 0.985831000  |
|                                |              |              |              | H                              | -0.220854000 | -0.707346000 | 1.794820000  |
|                                |              |              |              | H                              | -1.351849000 | 1.759348000  | 1.221012000  |
|                                |              |              |              | H                              | -1.332509000 | 1.889243000  | -0.540173000 |
|                                |              |              |              | H                              | 2.266592000  | -0.582188000 | 0.716512000  |
| <b>18 (X = CH<sub>3</sub>)</b> |              |              |              | <b>18 (X = F)</b>              |              |              |              |
| C                              | -1.523767000 | 0.544301000  | -0.841002000 | C                              | -1.662081000 | 0.479975000  | -0.673630000 |
| N                              | -1.924000000 | -0.813711000 | -0.576003000 | N                              | -1.740619000 | -0.965309000 | -0.677570000 |
| C                              | -0.869175000 | -1.798506000 | -0.695282000 | C                              | -0.492721000 | -1.720607000 | -0.791040000 |
| C                              | -0.442106000 | 1.262081000  | 0.011241000  | C                              | -0.579059000 | 1.146151000  | 0.166021000  |
| C                              | 0.225194000  | -1.718579000 | 0.369583000  | C                              | 0.506572000  | -1.583405000 | 0.359683000  |
| C                              | 1.365136000  | -0.718447000 | 0.135902000  | C                              | 1.441936000  | -0.404428000 | 0.217764000  |
| H                              | -1.169424000 | 0.592008000  | -1.880694000 | H                              | -1.476909000 | 0.782978000  | -1.709515000 |
| H                              | -0.429870000 | -1.706441000 | -1.697342000 | H                              | -0.055974000 | -1.416824000 | -1.750084000 |
| H                              | -0.239537000 | -1.558155000 | 1.348396000  | H                              | -0.032825000 | -1.504832000 | 1.303614000  |
| H                              | -2.426416000 | 1.165392000  | -0.789009000 | H                              | -2.636694000 | 0.869420000  | -0.375045000 |
| H                              | -1.338109000 | -2.788550000 | -0.655508000 | H                              | -0.785931000 | -2.766861000 | -0.893296000 |
| H                              | 0.715354000  | -2.696107000 | 0.451726000  | H                              | 1.135673000  | -2.474475000 | 0.419302000  |
| N                              | 0.911138000  | 0.664832000  | -0.261142000 | N                              | 0.771148000  | 0.817141000  | -0.323991000 |
| O                              | 1.867012000  | 1.469144000  | -0.528291000 | O                              | 1.021005000  | 1.181643000  | -1.511982000 |
| C                              | -0.733596000 | 1.265539000  | 1.512600000  | F                              | -2.280296000 | -1.331311000 | 0.617544000  |
| H                              | -0.721702000 | 0.273591000  | 1.961995000  | F                              | -0.721911000 | 2.482925000  | 0.085927000  |
| H                              | 0.007698000  | 1.879421000  | 2.032376000  | F                              | -0.641769000 | 0.791669000  | 1.467793000  |
| H                              | -1.720469000 | 1.700277000  | 1.701413000  | F                              | 2.436741000  | -0.683413000 | -0.639571000 |
| C                              | -0.409496000 | 2.706899000  | -0.476840000 | F                              | 2.005351000  | -0.083370000 | 1.405975000  |
| H                              | 0.338101000  | 3.292239000  | 0.056414000  |                                |              |              |              |
| H                              | -0.175124000 | 2.765000000  | -1.541277000 |                                |              |              |              |
| H                              | -1.392099000 | 3.156385000  | -0.310283000 |                                |              |              |              |
| C                              | 2.254266000  | -1.215227000 | -1.005441000 |                                |              |              |              |
| H                              | 1.688297000  | -1.331704000 | -1.933190000 |                                |              |              |              |
| H                              | 3.060565000  | -0.506311000 | -1.190413000 |                                |              |              |              |
| H                              | 2.687321000  | -2.184189000 | -0.743393000 |                                |              |              |              |
| C                              | 2.199641000  | -0.589611000 | 1.411563000  |                                |              |              |              |
| H                              | 3.012264000  | 0.122443000  | 1.257448000  |                                |              |              |              |
| H                              | 1.593448000  | -0.247408000 | 2.254684000  |                                |              |              |              |
| H                              | 2.631808000  | -1.558103000 | 1.679523000  |                                |              |              |              |
| C                              | -2.838312000 | -1.035040000 | 0.520455000  |                                |              |              |              |
| H                              | -2.392570000 | -1.024847000 | 1.529681000  |                                |              |              |              |
| H                              | -3.617355000 | -0.268075000 | 0.502983000  |                                |              |              |              |
| H                              | -3.324947000 | -2.008321000 | 0.394131000  |                                |              |              |              |
| <b>19 (X = H)</b>              |              |              |              | <b>19 (X = CH<sub>3</sub>)</b> |              |              |              |
| C                              | -2.736636000 | -0.367319000 | -0.005178000 | C                              | -3.285984000 | -0.338366000 | -0.008487000 |
| C                              | -1.709295000 | -1.303433000 | 0.072534000  | C                              | -2.268720000 | -1.287461000 | -0.014693000 |
| C                              | -2.442915000 | 0.994805000  | -0.086274000 | C                              | -2.976276000 | 1.023079000  | -0.015358000 |
| H                              | -1.931839000 | -2.364911000 | 0.131571000  | H                              | -2.501698000 | -2.348354000 | -0.009740000 |
| H                              | -3.247632000 | 1.718792000  | -0.152353000 | H                              | -3.772615000 | 1.759526000  | -0.014342000 |
| C                              | -0.386070000 | -0.883816000 | 0.083113000  |                                |              |              |              |

|                                |              |              |              |                   |              |              |              |
|--------------------------------|--------------|--------------|--------------|-------------------|--------------|--------------|--------------|
| C                              | -1.128726000 | 1.430066000  | -0.084461000 | C                 | -0.939384000 | -0.883392000 | -0.018449000 |
| H                              | -0.865903000 | 2.479593000  | -0.140347000 | C                 | -1.657071000 | 1.441442000  | -0.024049000 |
| C                              | -0.091989000 | 0.495885000  | 0.007096000  | H                 | -1.382703000 | 2.489163000  | -0.022091000 |
| H                              | -3.767093000 | -0.705013000 | -0.012559000 | C                 | -0.626985000 | 0.493088000  | -0.023052000 |
| C                              | 2.280124000  | -0.142524000 | 0.116140000  | H                 | -4.320606000 | -0.663342000 | -0.007213000 |
| N                              | 0.690724000  | -1.770144000 | 0.278050000  | C                 | 1.795220000  | -0.149202000 | -0.021237000 |
| N                              | 1.237619000  | 0.897316000  | 0.046950000  | N                 | 0.129285000  | -1.785645000 | 0.099834000  |
| O                              | 1.596394000  | 2.113191000  | 0.079737000  | N                 | 0.705836000  | 0.889622000  | 0.007000000  |
| O                              | 1.830245000  | -1.310677000 | -0.494519000 | C                 | 2.898547000  | 0.326110000  | -0.936711000 |
| H                              | 0.504572000  | -2.689954000 | -0.111273000 | H                 | 3.699213000  | -0.414227000 | -0.955281000 |
| H                              | 3.135867000  | 0.215112000  | -0.457142000 | H                 | 2.519003000  | 0.467722000  | -1.949422000 |
| H                              | 2.553563000  | -0.305919000 | 1.167533000  | H                 | 3.290023000  | 1.275168000  | -0.573993000 |
|                                |              |              |              | C                 | 2.257700000  | -0.407941000 | 1.399030000  |
|                                |              |              |              | H                 | 1.447292000  | -0.811058000 | 2.007035000  |
|                                |              |              |              | H                 | 3.083816000  | -1.121825000 | 1.396265000  |
|                                |              |              |              | H                 | 2.599257000  | 0.529260000  | 1.842132000  |
|                                |              |              |              | O                 | 1.041430000  | 2.106590000  | 0.141010000  |
|                                |              |              |              | O                 | 1.255911000  | -1.295363000 | -0.660064000 |
|                                |              |              |              | H                 | -0.067832000 | -2.683831000 | -0.330723000 |
| <b>19 (X = F)</b>              |              |              |              | <b>20 (X = H)</b> |              |              |              |
| C                              | -3.256389000 | -0.353136000 | -0.023799000 | C                 | -0.741141000 | 1.221762000  | 0.154114000  |
| C                              | -2.237048000 | -1.299272000 | 0.024966000  | C                 | 0.741234000  | 1.221783000  | -0.154049000 |
| C                              | -2.955205000 | 1.008539000  | -0.066370000 | C                 | 0.000058000  | -1.078817000 | -0.000287000 |
| H                              | -2.464730000 | -2.360163000 | 0.061443000  | H                 | 0.951749000  | 1.465335000  | -1.203564000 |
| H                              | -3.755963000 | 1.738192000  | -0.110825000 | H                 | 1.331918000  | 1.886923000  | 0.477559000  |
| C                              | -0.914108000 | -0.880417000 | 0.042142000  | N                 | -1.132044000 | -0.168934000 | -0.111141000 |
| C                              | -1.637989000 | 1.438073000  | -0.056364000 | O                 | -2.326904000 | -0.568204000 | -0.020784000 |
| H                              | -1.370227000 | 2.487247000  | -0.081575000 | N                 | 1.131917000  | -0.168947000 | 0.110233000  |
| C                              | -0.614486000 | 0.492397000  | -0.000938000 | O                 | 2.326894000  | -0.568265000 | 0.021685000  |
| H                              | -4.289133000 | -0.682982000 | -0.037763000 | H                 | -1.331786000 | 1.887361000  | -0.477052000 |
| C                              | 1.777862000  | -0.137907000 | -0.058939000 | H                 | -0.951755000 | 1.464353000  | 1.203799000  |
| N                              | 0.172238000  | -1.752125000 | 0.237251000  | H                 | 0.086885000  | -1.717922000 | -0.888684000 |
| N                              | 0.726724000  | 0.883965000  | 0.056871000  | H                 | -0.086943000 | -1.717500000 | 0.888424000  |
| O                              | 1.089910000  | 2.088265000  | 0.199620000  |                   |              |              |              |
| O                              | 1.287619000  | -1.304568000 | -0.582584000 |                   |              |              |              |
| H                              | 0.003191000  | -2.685683000 | -0.124917000 |                   |              |              |              |
| F                              | 2.355987000  | -0.310852000 | 1.144443000  |                   |              |              |              |
| F                              | 2.709355000  | 0.277660000  | -0.907299000 |                   |              |              |              |
| <b>20 (X = CH<sub>3</sub>)</b> |              |              |              | <b>20 (X = F)</b> |              |              |              |
| C                              | -1.341079000 | 0.294129000  | -0.020086000 | C                 | 1.297680000  | 0.328048000  | -0.012567000 |
| C                              | -0.454475000 | 1.494137000  | -0.334205000 | C                 | 0.393393000  | 1.531722000  | -0.192179000 |
| C                              | 1.051569000  | -0.400243000 | -0.028715000 | C                 | -1.000173000 | -0.443334000 | -0.011337000 |
| H                              | -0.439824000 | 1.721518000  | -1.410367000 | H                 | 0.630063000  | 2.330417000  | 0.511406000  |
| H                              | -0.731567000 | 2.402106000  | 0.205705000  | H                 | 0.457238000  | 1.912052000  | -1.216785000 |
| N                              | -0.357237000 | -0.818857000 | -0.176620000 | N                 | 0.401209000  | -0.817098000 | -0.119791000 |
| O                              | -0.699406000 | -2.029864000 | -0.042549000 | O                 | 0.791827000  | -2.012020000 | -0.040954000 |
| C                              | 1.681422000  | -0.979108000 | 1.223106000  | N                 | -0.943091000 | 0.999389000  | 0.074937000  |
| H                              | 2.680057000  | -0.557973000 | 1.352696000  | O                 | -1.989080000 | 1.701925000  | 0.056690000  |
| H                              | 1.083850000  | -0.746433000 | 2.106382000  | F                 | -1.693750000 | -0.862675000 | -1.078733000 |
| H                              | 1.754855000  | -2.063442000 | 1.128890000  | F                 | -1.577226000 | -0.981688000 | 1.065343000  |
| C                              | 1.841597000  | -0.739712000 | -1.282987000 | F                 | 2.266503000  | 0.247818000  | -0.938344000 |
| H                              | 1.378183000  | -0.296754000 | -2.167767000 | F                 | 1.908749000  | 0.314727000  | 1.195064000  |
| H                              | 2.859133000  | -0.355404000 | -1.191062000 |                   |              |              |              |
| H                              | 1.873726000  | -1.823226000 | -1.411859000 |                   |              |              |              |



|                   |              |              |              |                                |              |              |              |
|-------------------|--------------|--------------|--------------|--------------------------------|--------------|--------------|--------------|
| C                 | -1.843114000 | 0.309583000  | 1.421779000  |                                |              |              |              |
| H                 | -1.032287000 | 0.527031000  | 2.122299000  |                                |              |              |              |
| H                 | -2.617065000 | 1.070780000  | 1.550141000  |                                |              |              |              |
| H                 | -2.268888000 | -0.663465000 | 1.676249000  |                                |              |              |              |
| C                 | -2.477496000 | 0.096015000  | -1.004767000 |                                |              |              |              |
| H                 | -2.989119000 | -0.846350000 | -0.800003000 |                                |              |              |              |
| H                 | -3.203877000 | 0.908005000  | -0.919213000 |                                |              |              |              |
| H                 | -2.108253000 | 0.067257000  | -2.032713000 |                                |              |              |              |
| N                 | 0.875017000  | 1.063400000  | 0.098840000  |                                |              |              |              |
| O                 | 1.872665000  | 1.841832000  | 0.103840000  |                                |              |              |              |
| <b>21 (X = H)</b> |              |              |              | <b>21 (X = CH<sub>3</sub>)</b> |              |              |              |
| N                 | -1.113912000 | 0.233637000  | -0.000158000 | N                              | -0.666236000 | -1.079872000 | 0.127415000  |
| C                 | 0.760118000  | -1.213256000 | 0.000184000  | C                              | 0.828472000  | 0.748096000  | 0.122676000  |
| C                 | -0.760296000 | -1.213175000 | -0.000192000 | C                              | 0.793837000  | -0.785192000 | -0.121479000 |
| C                 | 0.000097000  | 0.982580000  | -0.000035000 | C                              | -1.411650000 | 0.033077000  | -0.001672000 |
| N                 | 1.113974000  | 0.233843000  | -0.000077000 | N                              | -0.617550000 | 1.112961000  | -0.129926000 |
| O                 | 2.311837000  | 0.624733000  | 0.000017000  | O                              | -0.991147000 | 2.317664000  | -0.255982000 |
| O                 | -2.311753000 | 0.624919000  | 0.000189000  | C                              | 1.722028000  | 1.536117000  | -0.812932000 |
| H                 | 1.209162000  | -1.666140000 | 0.886000000  | H                              | 1.617449000  | 2.601916000  | -0.605077000 |
| H                 | 1.209822000  | -1.666442000 | -0.885128000 | H                              | 2.766991000  | 1.254893000  | -0.655844000 |
| H                 | -1.209740000 | -1.666453000 | 0.885260000  | H                              | 1.472857000  | 1.374522000  | -1.861894000 |
| H                 | -1.209432000 | -1.666446000 | -0.885787000 | C                              | 1.104246000  | 1.134924000  | 1.572216000  |
| H                 | -0.000431000 | 2.059011000  | -0.000084000 | H                              | 0.465742000  | 0.584819000  | 2.267728000  |
|                   |              |              |              | H                              | 2.147003000  | 0.946060000  | 1.837317000  |
|                   |              |              |              | H                              | 0.905173000  | 2.201265000  | 1.697029000  |
|                   |              |              |              | C                              | -2.879190000 | 0.057508000  | 0.000649000  |
|                   |              |              |              | H                              | -3.278810000 | -0.477868000 | -0.865027000 |
|                   |              |              |              | H                              | -3.264300000 | -0.447254000 | 0.889861000  |
|                   |              |              |              | H                              | -3.220808000 | 1.091673000  | -0.020220000 |
|                   |              |              |              | C                              | 1.648245000  | -1.612739000 | 0.816796000  |
|                   |              |              |              | H                              | 2.705411000  | -1.379788000 | 0.662698000  |
|                   |              |              |              | H                              | 1.403689000  | -1.439923000 | 1.865041000  |
|                   |              |              |              | H                              | 1.495970000  | -2.672694000 | 0.608648000  |
|                   |              |              |              | C                              | 1.058103000  | -1.182767000 | -1.570348000 |
|                   |              |              |              | H                              | 2.108065000  | -1.033523000 | -1.832668000 |
|                   |              |              |              | H                              | 0.818220000  | -2.240561000 | -1.695988000 |
|                   |              |              |              | H                              | 0.443132000  | -0.608352000 | -2.267467000 |
|                   |              |              |              | O                              | -1.106831000 | -2.262785000 | 0.250733000  |
| <b>21 (X = F)</b> |              |              |              | <b>22 (X = H)</b>              |              |              |              |
| N                 | 0.656447000  | -1.134167000 | 0.028825000  | N                              | 1.188067000  | -0.436155000 | 0.021302000  |
| C                 | -0.781667000 | 0.780289000  | 0.032296000  | C                              | 1.244753000  | 1.026659000  | 0.209387000  |
| C                 | -0.781752000 | -0.780200000 | -0.032306000 | C                              | 0.000082000  | 1.678268000  | -0.354157000 |
| C                 | 1.377979000  | -0.000068000 | 0.000003000  | C                              | -1.244908000 | 1.026725000  | 0.208772000  |
| N                 | 0.656643000  | 1.134112000  | -0.028846000 | C                              | 0.000018000  | -1.061068000 | -0.074843000 |
| O                 | 1.072532000  | 2.322337000  | -0.057435000 | H                              | 0.000034000  | 2.744781000  | -0.120073000 |
| O                 | 1.072250000  | -2.322432000 | 0.057441000  | H                              | 0.000374000  | 1.589432000  | -1.445154000 |
| F                 | 2.662470000  | -0.000220000 | -0.000005000 | N                              | -1.188040000 | -0.436163000 | 0.021270000  |
| F                 | -1.303782000 | 1.225313000  | 1.173298000  | O                              | -2.285559000 | -1.078668000 | -0.027232000 |
| F                 | -1.429336000 | 1.327719000  | -0.986992000 | H                              | 0.000014000  | -2.131584000 | -0.213897000 |
| F                 | -1.303978000 | -1.225170000 | -1.173289000 | O                              | 2.285620000  | -1.078574000 | -0.027596000 |
| F                 | -1.429513000 | -1.327529000 | 0.987003000  | H                              | 2.158455000  | 1.350844000  | -0.288839000 |
|                   |              |              |              | H                              | 1.360938000  | 1.218049000  | 1.282285000  |
|                   |              |              |              | H                              | -2.158312000 | 1.350650000  | -0.290175000 |
|                   |              |              |              | H                              | -1.361852000 | 1.218485000  | 1.281516000  |

|                                                                                                                                                                                                                                                                                                                                                                                                                                                                                                                                                                                                                                                                                                                                                                                                                                                                                                                                                                                                                                                                                                                                                                                                                                                                                                      |                                                                                                                                                                                                                                                                                                                                                                                                                                                                                                                                                                                                                                                                                                                                                                                                                                                                                                                       |
|------------------------------------------------------------------------------------------------------------------------------------------------------------------------------------------------------------------------------------------------------------------------------------------------------------------------------------------------------------------------------------------------------------------------------------------------------------------------------------------------------------------------------------------------------------------------------------------------------------------------------------------------------------------------------------------------------------------------------------------------------------------------------------------------------------------------------------------------------------------------------------------------------------------------------------------------------------------------------------------------------------------------------------------------------------------------------------------------------------------------------------------------------------------------------------------------------------------------------------------------------------------------------------------------------|-----------------------------------------------------------------------------------------------------------------------------------------------------------------------------------------------------------------------------------------------------------------------------------------------------------------------------------------------------------------------------------------------------------------------------------------------------------------------------------------------------------------------------------------------------------------------------------------------------------------------------------------------------------------------------------------------------------------------------------------------------------------------------------------------------------------------------------------------------------------------------------------------------------------------|
| <p><b>22 (X = CH<sub>3</sub>)</b></p> <p>N -1.227076000 0.946429000 -0.092661000<br/> C -1.307518000 -0.553548000 -0.019296000<br/> C -0.012994000 -1.107059000 -0.617400000<br/> C 1.316384000 -0.529957000 -0.126067000<br/> C -0.037942000 1.566891000 -0.001439000<br/> H 0.003982000 -2.192269000 -0.471102000<br/> H -0.068890000 -0.948486000 -1.700647000<br/> N 1.157513000 0.954923000 0.061204000<br/> O 2.218374000 1.633712000 0.260932000<br/> C 2.380492000 -0.727597000 -1.201604000<br/> H 2.089687000 -0.245418000 -2.137993000<br/> H 3.332552000 -0.306328000 -0.879481000<br/> H 2.511066000 -1.796138000 -1.391126000<br/> C 1.818448000 -1.114819000 1.190338000<br/> H 2.026350000 -2.180261000 1.062511000<br/> H 2.744322000 -0.613258000 1.477447000<br/> H 1.105518000 -1.004000000 2.006482000<br/> C -1.550137000 -0.912530000 1.445595000<br/> H -1.515527000 -1.996700000 1.582017000<br/> H -0.816759000 -0.457558000 2.112345000<br/> H -2.536782000 -0.557482000 1.750271000<br/> C -2.486302000 -1.004852000 -0.867353000<br/> H -3.415466000 -0.573061000 -0.498085000<br/> H -2.363063000 -0.704405000 -1.910220000<br/> H -2.561603000 -2.094408000 -0.827842000<br/> H -0.043450000 2.645025000 0.066201000<br/> O -2.309322000 1.618301000 -0.115584000</p> | <p><b>22 (X = F)</b></p> <p>N -1.197244000 0.937653000 -0.038085000<br/> C -1.258316000 -0.549418000 -0.068984000<br/> C 0.000047000 -1.139055000 -0.651499000<br/> C 1.258407000 -0.549232000 -0.069061000<br/> C -0.000201000 1.557072000 -0.007314000<br/> H 0.000209000 -2.218225000 -0.494420000<br/> H -0.000052000 -0.942916000 -1.725880000<br/> N 1.197028000 0.937754000 -0.037736000<br/> O 2.289904000 1.570582000 0.028378000<br/> H -0.000165000 2.634649000 0.063017000<br/> O -2.290296000 1.570188000 0.027617000<br/> F 2.317925000 -0.896201000 -0.805233000<br/> F 1.479432000 -0.972807000 1.194602000<br/> F -2.318045000 -0.896583000 -0.804496000<br/> F -1.478753000 -0.972599000 1.195263000</p>                                                                                                                                                                                            |
| <p><b>23 (X = H)</b></p> <p>N -1.201881000 -1.113020000 -0.000180000<br/> C -1.982953000 0.000012000 -0.000160000<br/> N -1.201877000 1.113029000 -0.000028000<br/> O -1.587022000 2.314699000 0.000025000<br/> O -1.587054000 -2.314685000 -0.000287000<br/> C 2.503992000 0.700868000 0.000255000<br/> C 1.319532000 1.432222000 0.000210000<br/> C 2.503988000 -0.700879000 0.000158000<br/> H 1.296608000 2.515253000 0.000280000<br/> H 3.451527000 -1.228593000 0.000200000<br/> C 0.149643000 0.695711000 0.000061000<br/> C 1.319527000 -1.432233000 0.000014000<br/> H 1.296615000 -2.515265000 -0.000062000<br/> C 0.149632000 -0.695725000 -0.000035000<br/> H 3.451537000 1.228575000 0.000369000<br/> H -3.057538000 0.000000000 -0.000252000</p>                                                                                                                                                                                                                                                                                                                                                                                                                                                                                                                                       | <p><b>23 (X = CH<sub>3</sub>)</b></p> <p>N 0.857476000 -1.105909000 0.000459000<br/> C 1.650033000 0.003276000 -0.000027000<br/> N 0.852739000 1.111273000 0.000588000<br/> O 1.240492000 2.316297000 0.000723000<br/> C 3.113696000 0.002210000 -0.001570000<br/> H 3.508770000 -0.456180000 0.909524000<br/> H 3.500937000 -0.574879000 -0.845217000<br/> H 3.466421000 1.031223000 -0.068087000<br/> O 1.261054000 -2.306198000 0.000463000<br/> C -2.853131000 0.694414000 -0.000446000<br/> C -1.668044000 1.427659000 -0.000246000<br/> C -2.850500000 -0.705841000 -0.000188000<br/> H -1.646875000 2.510761000 -0.000494000<br/> H -3.796753000 -1.235908000 -0.000196000<br/> C -0.497415000 0.694292000 0.000171000<br/> C -1.662791000 -1.434818000 0.000080000<br/> H -1.638001000 -2.517858000 0.000211000<br/> C -0.494694000 -0.697281000 0.000256000<br/> H -3.801294000 1.221046000 -0.000731000</p> |
| <p><b>23 (X = F)</b></p> <p>N -0.890620000 -1.123241000 -0.000124000<br/> C -1.647750000 0.000127000 -0.000154000<br/> N -0.890553000 1.123374000 0.000038000<br/> O -1.300910000 2.318338000 0.000082000<br/> O -1.301395000 -2.318151000 -0.000246000</p>                                                                                                                                                                                                                                                                                                                                                                                                                                                                                                                                                                                                                                                                                                                                                                                                                                                                                                                                                                                                                                          | <p><b>24 (X = H)</b></p> <p>N -0.070523000 -0.341081000 -0.000010000<br/> O -1.187278000 0.140049000 -0.000003000<br/> C 1.124660000 0.114438000 0.000009000<br/> H 1.314042000 1.186634000 0.000050000<br/> H 1.929883000 -0.606087000 -0.000009000</p>                                                                                                                                                                                                                                                                                                                                                                                                                                                                                                                                                                                                                                                              |

|                                |              |              |              |                                |              |              |              |
|--------------------------------|--------------|--------------|--------------|--------------------------------|--------------|--------------|--------------|
| C                              | 2.816712000  | 0.699294000  | 0.000265000  |                                |              |              |              |
| C                              | 1.629839000  | 1.431208000  | 0.000218000  |                                |              |              |              |
| C                              | 2.816663000  | -0.699467000 | 0.000174000  |                                |              |              |              |
| H                              | 1.605958000  | 2.514184000  | 0.000293000  |                                |              |              |              |
| H                              | 3.763332000  | -1.228398000 | 0.000221000  |                                |              |              |              |
| C                              | 0.461770000  | 0.696525000  | 0.000082000  |                                |              |              |              |
| C                              | 1.629787000  | -1.431360000 | 0.000029000  |                                |              |              |              |
| H                              | 1.605978000  | -2.514338000 | -0.000041000 |                                |              |              |              |
| C                              | 0.461679000  | -0.696695000 | -0.000012000 |                                |              |              |              |
| H                              | 3.763419000  | 1.228155000  | 0.000383000  |                                |              |              |              |
| F                              | -2.940471000 | 0.000020000  | -0.000282000 |                                |              |              |              |
| <b>24 (X = CH<sub>3</sub>)</b> |              |              |              | <b>24 (X = F)</b>              |              |              |              |
| N                              | -0.795060000 | -0.619293000 | -0.000032000 | N                              | 0.793868000  | -0.534133000 | 0.000022000  |
| O                              | -1.961462000 | -0.229624000 | 0.000017000  | O                              | 1.918840000  | -0.005320000 | 0.000010000  |
| C                              | 0.341924000  | -0.017427000 | 0.000010000  | C                              | -0.362098000 | -0.041181000 | 0.000000000  |
| C                              | 0.426401000  | 1.475820000  | -0.000017000 | F                              | -0.650513000 | 1.241967000  | -0.000046000 |
| C                              | 1.584600000  | -0.838475000 | 0.000004000  | F                              | -1.431177000 | -0.794347000 | 0.000020000  |
| H                              | 1.354760000  | -1.903621000 | 0.000207000  |                                |              |              |              |
| H                              | 2.200314000  | -0.617560000 | -0.878537000 |                                |              |              |              |
| H                              | 2.200406000  | -0.617237000 | 0.878407000  |                                |              |              |              |
| H                              | 0.974954000  | 1.830624000  | -0.878850000 |                                |              |              |              |
| H                              | 0.973633000  | 1.830758000  | 0.879614000  |                                |              |              |              |
| H                              | -0.564495000 | 1.929574000  | -0.000734000 |                                |              |              |              |
| <b>25 (X = H)</b>              |              |              |              | <b>25 (X = CH<sub>3</sub>)</b> |              |              |              |
| C                              | -1.468628000 | -0.994573000 | -0.000113000 | C                              | 1.422521000  | 0.417476000  | -0.000333000 |
| N                              | -2.569456000 | -0.320463000 | -0.000143000 | N                              | 2.297478000  | -0.539511000 | -0.000070000 |
| O                              | -2.829144000 | 0.875392000  | -0.000117000 | O                              | 2.232462000  | -1.764531000 | 0.000441000  |
| C                              | -0.128528000 | -0.429471000 | -0.000025000 | C                              | -0.021742000 | 0.162065000  | -0.000260000 |
| C                              | 0.962440000  | -1.312401000 | 0.000063000  | C                              | -0.909431000 | 1.251441000  | 0.000054000  |
| C                              | 0.116070000  | 0.950818000  | -0.000027000 | C                              | -0.561094000 | -1.133806000 | -0.000280000 |
| C                              | 2.261808000  | -0.828103000 | 0.000155000  | C                              | -2.282465000 | 1.050265000  | 0.000201000  |
| C                              | 1.419791000  | 1.427666000  | 0.000063000  | C                              | -1.935370000 | -1.327221000 | -0.000119000 |
| C                              | 2.495709000  | 0.544381000  | 0.000155000  | C                              | -2.803123000 | -0.239446000 | 0.000148000  |
| H                              | 0.779209000  | -2.383111000 | 0.000062000  | H                              | -0.522801000 | 2.264433000  | 0.000025000  |
| H                              | -0.716641000 | 1.645622000  | -0.000100000 | H                              | 0.099977000  | -1.992295000 | -0.000565000 |
| H                              | 3.094910000  | -1.523362000 | 0.000226000  | H                              | -2.948524000 | 1.907053000  | 0.000268000  |
| H                              | 1.596938000  | 2.498136000  | 0.000060000  | H                              | -2.330852000 | -2.337655000 | -0.000084000 |
| H                              | 3.512039000  | 0.923876000  | 0.000228000  | H                              | -3.876678000 | -0.396109000 | 0.000279000  |
| H                              | -1.599075000 | -2.070953000 | -0.000163000 | C                              | 1.972161000  | 1.807787000  | 0.000048000  |
|                                |              |              |              | H                              | 3.060907000  | 1.781231000  | -0.000218000 |
|                                |              |              |              | H                              | 1.643434000  | 2.367612000  | -0.880746000 |
|                                |              |              |              | H                              | 1.643755000  | 2.367190000  | 0.881253000  |
| <b>25 (X = F)</b>              |              |              |              | <b>26 (X = H)</b>              |              |              |              |
| C                              | 1.389834000  | 0.479387000  | -0.000051000 | C                              | -1.832981000 | -1.222027000 | 0.000227000  |
| N                              | 2.371371000  | -0.344160000 | -0.000189000 | N                              | -3.123992000 | -1.151560000 | -0.000206000 |
| O                              | 2.411935000  | -1.577761000 | -0.000280000 | O                              | -3.926402000 | -0.227967000 | -0.000545000 |
| C                              | -0.029216000 | 0.184733000  | 0.000024000  | H                              | 0.463009000  | -2.482986000 | 0.000108000  |
| C                              | -0.953816000 | 1.240014000  | 0.000074000  | C                              | 1.086619000  | -1.597020000 | 0.000161000  |
| C                              | -0.491398000 | -1.138426000 | 0.000045000  | C                              | 2.451822000  | -1.758245000 | 0.000180000  |
| C                              | -2.313778000 | 0.968427000  | 0.000141000  | C                              | 3.304755000  | -0.638963000 | -0.000112000 |
| C                              | -1.854555000 | -1.395735000 | 0.000117000  | C                              | 2.768096000  | 0.623412000  | -0.000381000 |
| C                              | -2.769291000 | -0.346630000 | 0.000164000  | C                              | 1.367223000  | 0.824541000  | -0.000227000 |

|                                |              |              |              |                                |              |              |              |
|--------------------------------|--------------|--------------|--------------|--------------------------------|--------------|--------------|--------------|
| H                              | -0.596732000 | 2.262747000  | 0.000061000  | C                              | 0.495445000  | -0.311221000 | -0.000025000 |
| H                              | 0.217397000  | -1.959164000 | 0.000007000  | C                              | -0.924629000 | -0.085943000 | 0.000242000  |
| H                              | -3.022443000 | 1.789886000  | 0.000177000  | C                              | -1.407161000 | 1.214434000  | 0.000464000  |
| H                              | -2.203884000 | -2.422608000 | 0.000136000  | C                              | -0.538952000 | 2.316464000  | 0.000321000  |
| H                              | -3.834150000 | -0.553856000 | 0.000216000  | C                              | 0.820378000  | 2.128262000  | -0.000094000 |
| F                              | 1.742005000  | 1.773730000  | -0.000013000 | H                              | 2.874160000  | -2.757703000 | 0.000514000  |
|                                |              |              |              | H                              | 4.380686000  | -0.777712000 | -0.000202000 |
|                                |              |              |              | H                              | 3.412740000  | 1.497741000  | -0.000679000 |
|                                |              |              |              | H                              | 1.498257000  | 2.976760000  | -0.000451000 |
|                                |              |              |              | H                              | -0.953774000 | 3.318703000  | 0.000706000  |
|                                |              |              |              | H                              | -2.477479000 | 1.385111000  | 0.000666000  |
|                                |              |              |              | H                              | -1.462126000 | -2.237426000 | 0.000605000  |
| <b>26 (X = CH<sub>3</sub>)</b> |              |              |              | <b>26 (X = F)</b>              |              |              |              |
| C                              | 1.893398000  | -0.746078000 | 0.198529000  | C                              | 1.862108000  | -0.803175000 | 0.138758000  |
| N                              | 3.040606000  | -0.473241000 | -0.337017000 | N                              | 3.093792000  | -0.613156000 | -0.162353000 |
| O                              | 3.482002000  | 0.450270000  | -1.011818000 | O                              | 3.712046000  | 0.364117000  | -0.589830000 |
| C                              | 1.826618000  | -2.019961000 | 0.991989000  | H                              | -0.372872000 | -2.345896000 | -0.172084000 |
| H                              | 1.636066000  | -2.899628000 | 0.369927000  | C                              | -1.075500000 | -1.527024000 | -0.125968000 |
| H                              | 2.773420000  | -2.190665000 | 1.506978000  | C                              | -2.419742000 | -1.799517000 | -0.216277000 |
| H                              | 1.032935000  | -1.966052000 | 1.738385000  | C                              | -3.372915000 | -0.765973000 | -0.166880000 |
| H                              | -0.224674000 | -2.281511000 | -0.379324000 | C                              | -2.954014000 | 0.533807000  | -0.048485000 |
| C                              | -0.979611000 | -1.516601000 | -0.250859000 | C                              | -1.578098000 | 0.855315000  | 0.033637000  |
| C                              | -2.304348000 | -1.859207000 | -0.373323000 | C                              | -0.604480000 | -0.197769000 | 0.015480000  |
| C                              | -3.310757000 | -0.881544000 | -0.253898000 | C                              | 0.781405000  | 0.173256000  | 0.100207000  |
| C                              | -2.963821000 | 0.428939000  | -0.046843000 | C                              | 1.136092000  | 1.513390000  | 0.145943000  |
| C                              | -1.607993000 | 0.819418000  | 0.068820000  | C                              | 0.169177000  | 2.527416000  | 0.153251000  |
| C                              | -0.582839000 | -0.179850000 | -0.000908000 | C                              | -1.163076000 | 2.203817000  | 0.110194000  |
| C                              | 0.783483000  | 0.229919000  | 0.128241000  | H                              | -2.747257000 | -2.827715000 | -0.329875000 |
| C                              | 1.078266000  | 1.577841000  | 0.232555000  | H                              | -4.430529000 | -0.998378000 | -0.232392000 |
| C                              | 0.067383000  | 2.551071000  | 0.280088000  | H                              | -3.672725000 | 1.347843000  | -0.024668000 |
| C                              | -1.251673000 | 2.178813000  | 0.219488000  | H                              | -1.922655000 | 2.979963000  | 0.121401000  |
| H                              | -2.576655000 | -2.890110000 | -0.575718000 | H                              | 0.484905000  | 3.563602000  | 0.201917000  |
| H                              | -4.354360000 | -1.164600000 | -0.345085000 | H                              | 2.184505000  | 1.784760000  | 0.197700000  |
| H                              | -3.727840000 | 1.198630000  | 0.019285000  | F                              | 1.604219000  | -2.045142000 | 0.583773000  |
| H                              | -2.042159000 | 2.922246000  | 0.269342000  |                                |              |              |              |
| H                              | 0.339418000  | 3.596682000  | 0.380079000  |                                |              |              |              |
| H                              | 2.114953000  | 1.888980000  | 0.306518000  |                                |              |              |              |
| <b>27 (X = H)</b>              |              |              |              | <b>27 (X = CH<sub>3</sub>)</b> |              |              |              |
| C                              | 0.019305000  | 0.845845000  | 0.017940000  | C                              | 0.050519000  | 0.662492000  | -0.085631000 |
| N                              | 0.028878000  | 2.147304000  | 0.028256000  | N                              | 0.077449000  | 1.961172000  | -0.154237000 |
| O                              | -0.842092000 | 3.007351000  | 0.012170000  | O                              | -0.772696000 | 2.824926000  | -0.322920000 |
| C                              | -1.251617000 | 0.097561000  | -0.022845000 | C                              | -1.248571000 | -0.047704000 | -0.203635000 |
| C                              | -1.303011000 | -1.162917000 | -0.636396000 | C                              | -1.375099000 | -1.030516000 | -1.192428000 |
| C                              | -2.430504000 | 0.632086000  | 0.512139000  | C                              | -2.334063000 | 0.246192000  | 0.640901000  |
| C                              | -2.496900000 | -1.867977000 | -0.702802000 | C                              | -2.570356000 | -1.709333000 | -1.372612000 |
| C                              | -3.619048000 | -0.082896000 | 0.453115000  | C                              | -3.526887000 | -0.456325000 | 0.444655000  |
| C                              | -3.658493000 | -1.334357000 | -0.153795000 | C                              | -3.653804000 | -1.416420000 | -0.549455000 |
| H                              | -0.403562000 | -1.580369000 | -1.076426000 | H                              | -0.519348000 | -1.253996000 | -1.822998000 |
| H                              | -2.414527000 | 1.609016000  | 0.982127000  | H                              | -2.655910000 | -2.462166000 | -2.149045000 |
| H                              | -2.519875000 | -2.836584000 | -1.191616000 | H                              | -4.367937000 | -0.244735000 | 1.099431000  |
| H                              | -4.520535000 | 0.342337000  | 0.881860000  | H                              | -4.594193000 | -1.943026000 | -0.676446000 |
| H                              | -4.590572000 | -1.887389000 | -0.204567000 | C                              | 1.312457000  | -0.070014000 | 0.092147000  |
| C                              | 1.340832000  | 0.194799000  | 0.034965000  | C                              | 2.574431000  | 0.443411000  | -0.291854000 |
| C                              | 2.443678000  | 0.812280000  | -0.568893000 | C                              | 1.245638000  | -1.344955000 | 0.675753000  |
| C                              | 1.532275000  | -1.028812000 | 0.688332000  | C                              | 3.702828000  | -0.345958000 | -0.065974000 |
| C                              | 3.699444000  | 0.224618000  | -0.518785000 |                                |              |              |              |

|                   |              |              |              |   |              |              |              |
|-------------------|--------------|--------------|--------------|---|--------------|--------------|--------------|
| C                 | 2.790392000  | -1.616209000 | 0.733724000  | C | 2.383757000  | -2.105788000 | 0.893838000  |
| C                 | 3.878238000  | -0.994219000 | 0.129917000  | C | 3.623923000  | -1.603303000 | 0.520230000  |
| H                 | 2.300250000  | 1.757078000  | -1.083858000 | H | 0.276087000  | -1.734463000 | 0.969274000  |
| H                 | 0.692801000  | -1.510928000 | 1.179094000  | H | 4.670954000  | 0.042522000  | -0.370395000 |
| H                 | 4.541517000  | 0.715400000  | -0.995967000 | H | 2.300214000  | -3.084649000 | 1.353983000  |
| H                 | 2.922207000  | -2.561130000 | 1.250804000  | H | 4.525284000  | -2.186583000 | 0.677584000  |
| H                 | 4.859350000  | -1.456195000 | 0.163698000  | C | 2.749514000  | 1.780871000  | -0.942920000 |
|                   |              |              |              | H | 3.762229000  | 1.882296000  | -1.338413000 |
|                   |              |              |              | H | 2.045339000  | 1.933067000  | -1.765444000 |
|                   |              |              |              | H | 2.582859000  | 2.604526000  | -0.242305000 |
|                   |              |              |              | C | -2.231015000 | 1.253887000  | 1.742387000  |
|                   |              |              |              | H | -2.981413000 | 1.068887000  | 2.512887000  |
|                   |              |              |              | H | -1.244491000 | 1.239495000  | 2.213709000  |
|                   |              |              |              | H | -2.379869000 | 2.271991000  | 1.368773000  |
| <b>27 (X = F)</b> |              |              |              |   |              |              |              |
| C                 | 0.044650000  | 0.671207000  | -0.062932000 |   |              |              |              |
| N                 | 0.051108000  | 1.970199000  | -0.140653000 |   |              |              |              |
| O                 | -0.815610000 | 2.807056000  | -0.306717000 |   |              |              |              |
| C                 | -1.232305000 | -0.066497000 | -0.167724000 |   |              |              |              |
| C                 | -1.366663000 | -1.139008000 | -1.058577000 |   |              |              |              |
| C                 | -2.352997000 | 0.280749000  | 0.586032000  |   |              |              |              |
| C                 | -2.570311000 | -1.814140000 | -1.194414000 |   |              |              |              |
| C                 | -3.564849000 | -0.378451000 | 0.466774000  |   |              |              |              |
| C                 | -3.671731000 | -1.430311000 | -0.433251000 |   |              |              |              |
| H                 | -0.504973000 | -1.429785000 | -1.651726000 |   |              |              |              |
| F                 | -2.247685000 | 1.270717000  | 1.487574000  |   |              |              |              |
| H                 | -2.652193000 | -2.635168000 | -1.898066000 |   |              |              |              |
| H                 | -4.398116000 | -0.064666000 | 1.084332000  |   |              |              |              |
| H                 | -4.616649000 | -1.953277000 | -0.535736000 |   |              |              |              |
| C                 | 1.315611000  | -0.038442000 | 0.098610000  |   |              |              |              |
| C                 | 2.551499000  | 0.491868000  | -0.293460000 |   |              |              |              |
| C                 | 1.341333000  | -1.321352000 | 0.667025000  |   |              |              |              |
| C                 | 3.743832000  | -0.189381000 | -0.133387000 |   |              |              |              |
| C                 | 2.526149000  | -2.021619000 | 0.837124000  |   |              |              |              |
| C                 | 3.732530000  | -1.455987000 | 0.438051000  |   |              |              |              |
| F                 | 2.594630000  | 1.705761000  | -0.869125000 |   |              |              |              |
| H                 | 0.402695000  | -1.762372000 | 0.986536000  |   |              |              |              |
| H                 | 4.661703000  | 0.282089000  | -0.464882000 |   |              |              |              |
| H                 | 2.507310000  | -3.008697000 | 1.285928000  |   |              |              |              |
| H                 | 4.664356000  | -1.996074000 | 0.566652000  |   |              |              |              |
